# Supplementary material for: Comprehensive fitness maps of Hsp90 show widespread environmental dependence
Source: eLife journal article supplement (doi:10.7554/elife.53810), 2020-03-04
Supplement: supp [file elife-53810-supp-v1.zip]

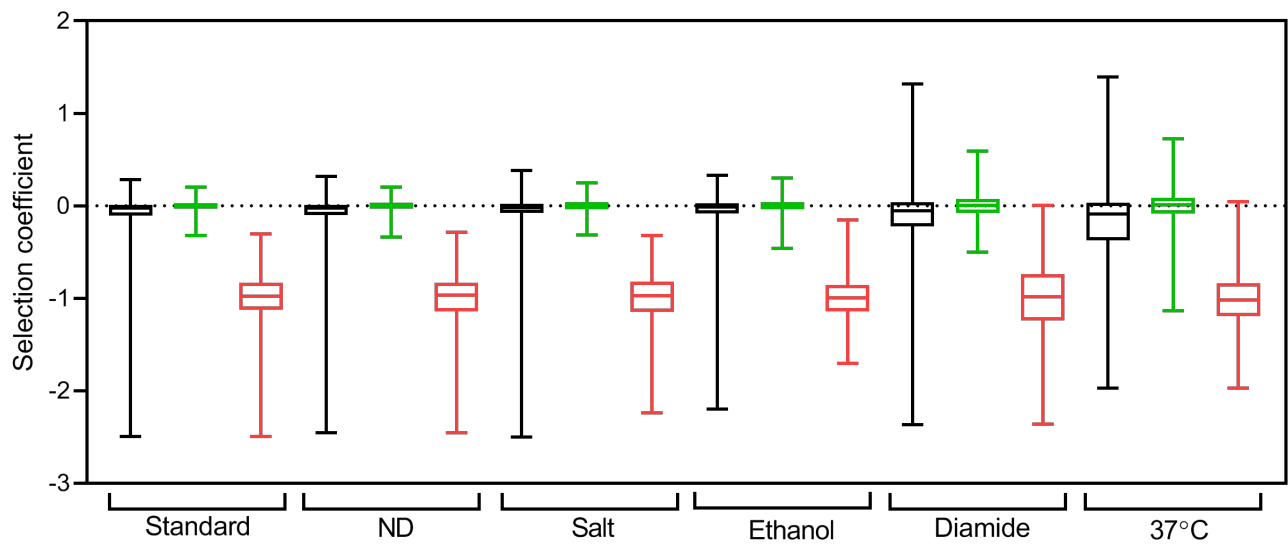

**Figure 2 – figure supplement 6.** Distribution of selection coefficients for non-synonymous mutations (black), wildtype synonyms (green), and stops (red) in each environmental condition.
