# Supplementary material for: Comprehensive fitness maps of Hsp90 show widespread environmental dependence
Source: eLife journal article supplement (doi:10.7554/elife.53810), 2020-03-04
Supplement: supp [file elife-53810-supp-v1.zip]

High temperature (37°C)

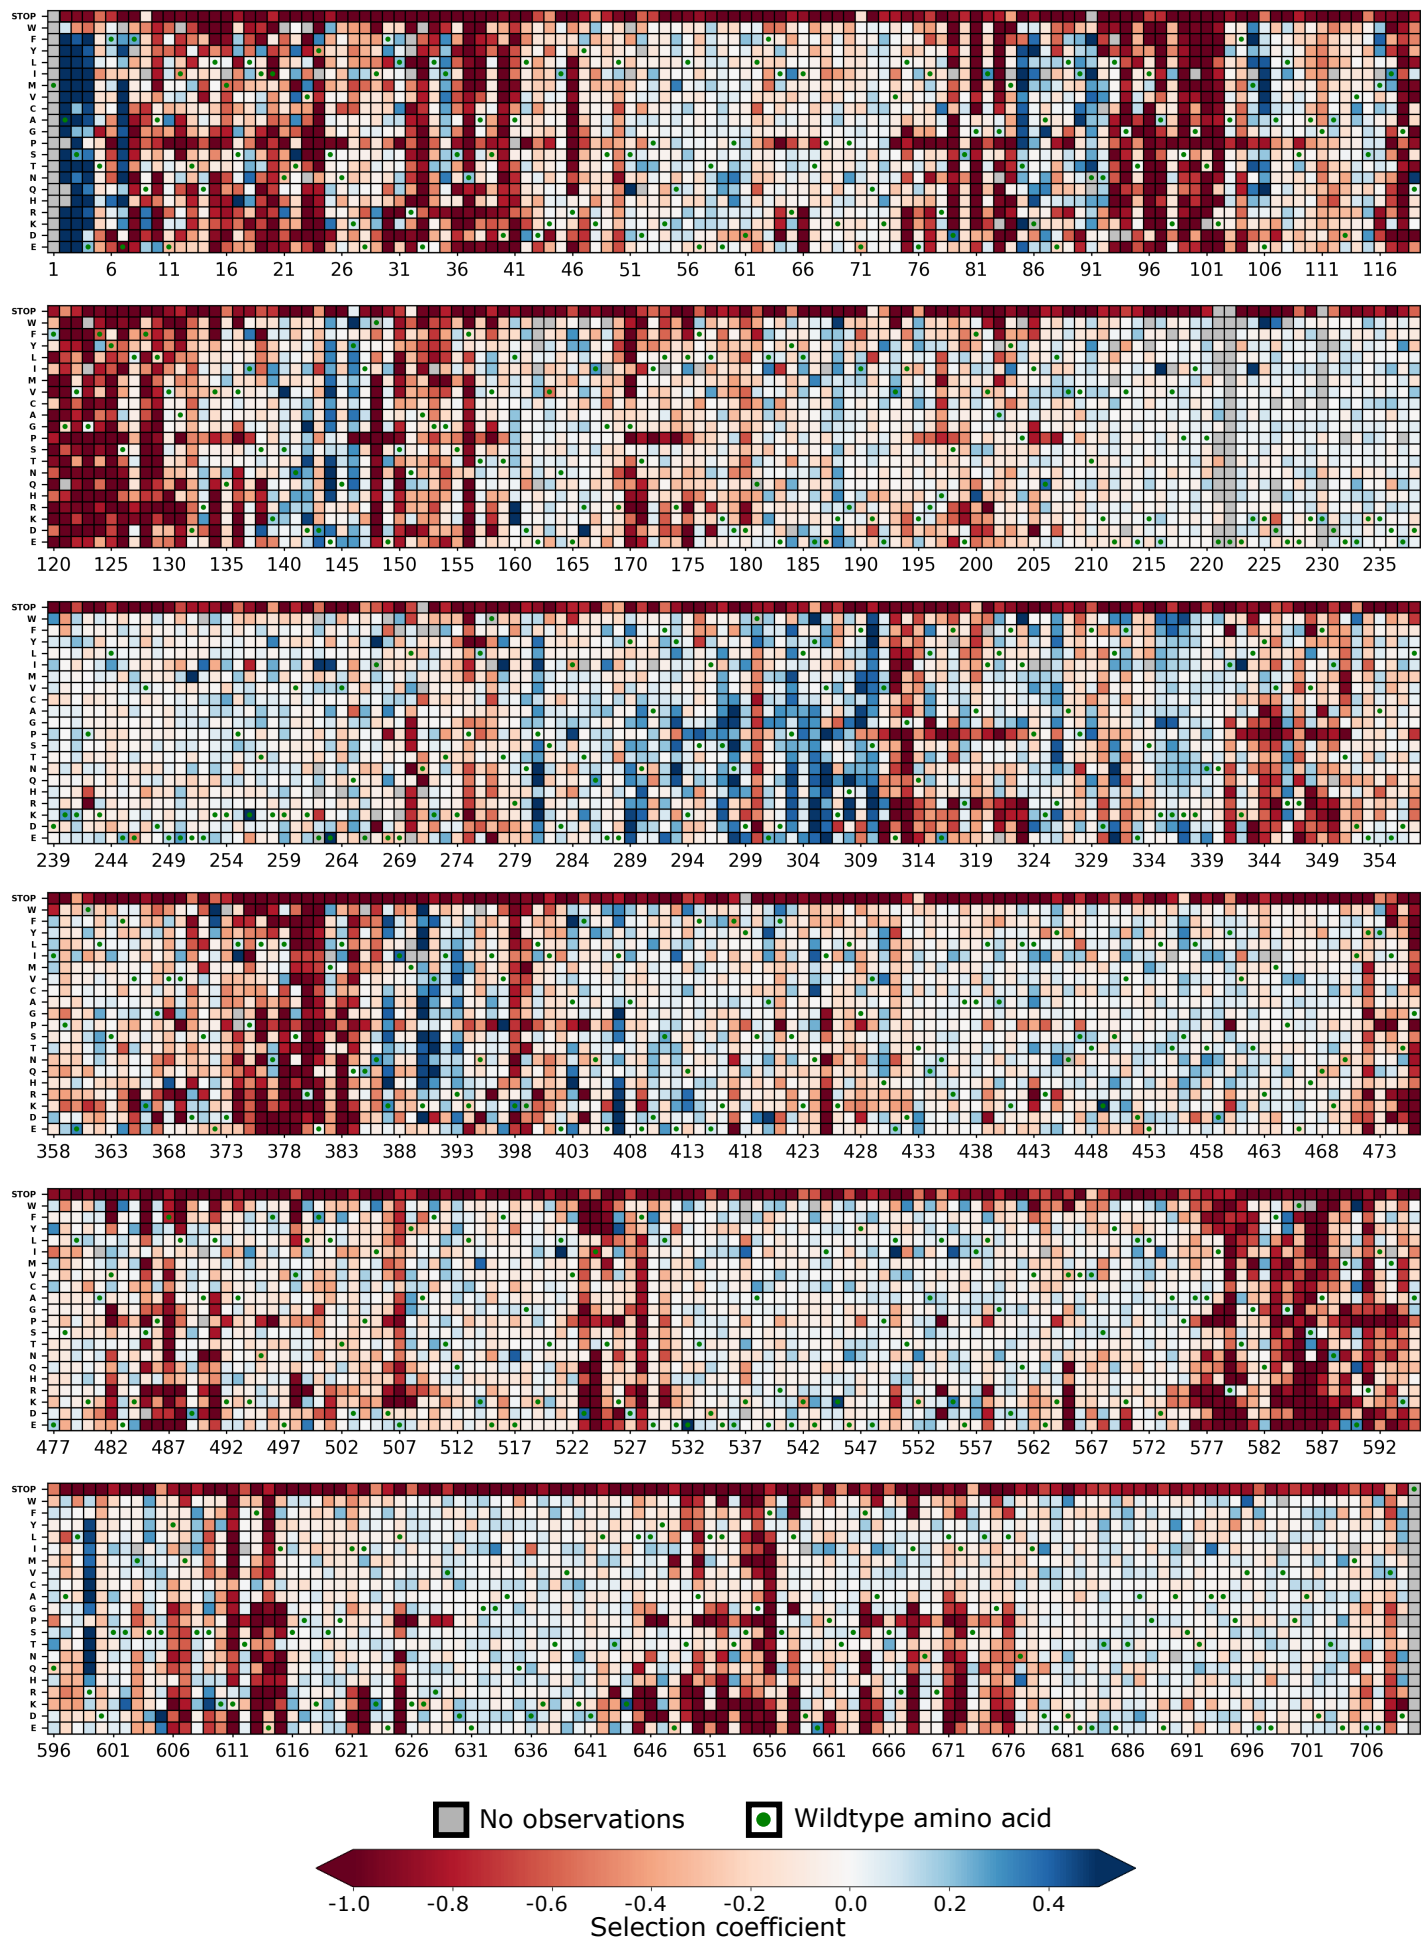

**Figure 2 – figure supplement 5.** Heatmap representation of the selection coefficients observed for single amino acid changes of Hsp90 at 37°C.
