# Supplementary material for: Comprehensive fitness maps of Hsp90 show widespread environmental dependence
Source: eLife journal article supplement (doi:10.7554/elife.53810), 2020-03-04
Supplement: supp [file elife-53810-supp-v1.zip]

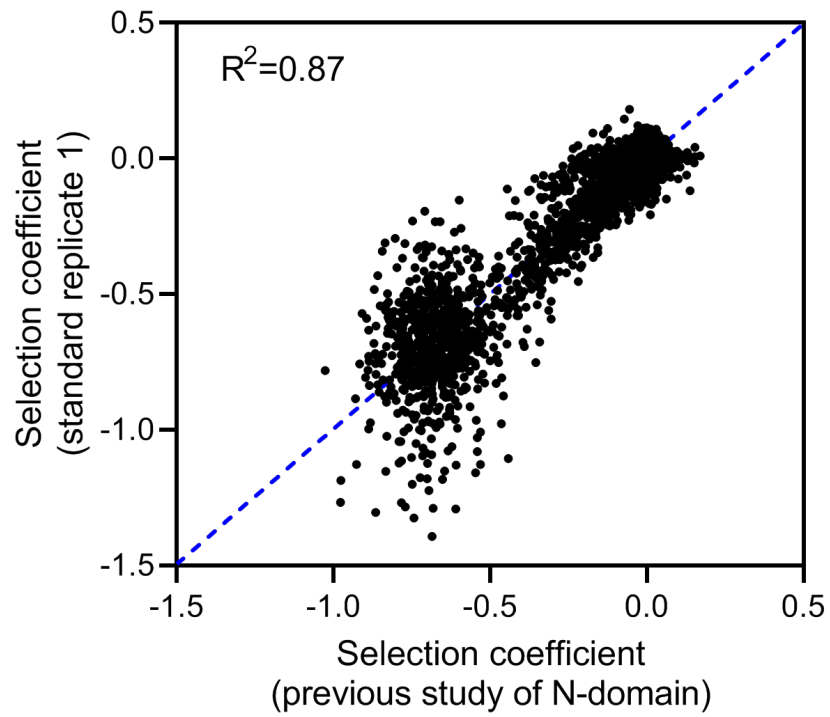

**Figure 1 – figure supplement 2.** Measurement of selection coefficients for positions 2-220 in this study correlated strongly ( $R^2=0.87$ ) with estimates of the Hsp90 N-domain in a previous study (Mishra, Flynn & Bolon, 2016). The blue dashed line indicates the line of best fit.
