# Supplementary material for: Comprehensive fitness maps of Hsp90 show widespread environmental dependence
Source: eLife journal article supplement (doi:10.7554/elife.53810), 2020-03-04
Supplement: supp [file elife-53810-supp-v1.zip]

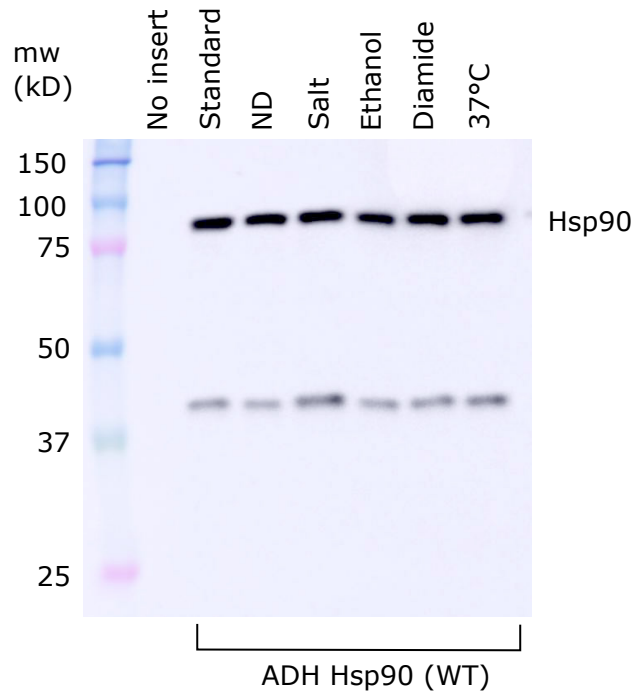

**Figure 6 – figure supplement 1.** Hsp90 expression in the Hsp90 shutoff yeast strain harboring either wildtype Hsp90 under the constitutive ADH promoter or a null plasmid (no insert). Cells were grown for 12 hours in dextrose media at 30°C and then were transferred into the individual environmental conditions and grown for 8 additional hours. Hsp90 levels were monitored by Western blotting.
