# Supplementary material for: Comprehensive fitness maps of Hsp90 show widespread environmental dependence
Source: eLife journal article supplement (doi:10.7554/elife.53810), 2020-03-04
Supplement: supp [file elife-53810-supp-v1.zip]

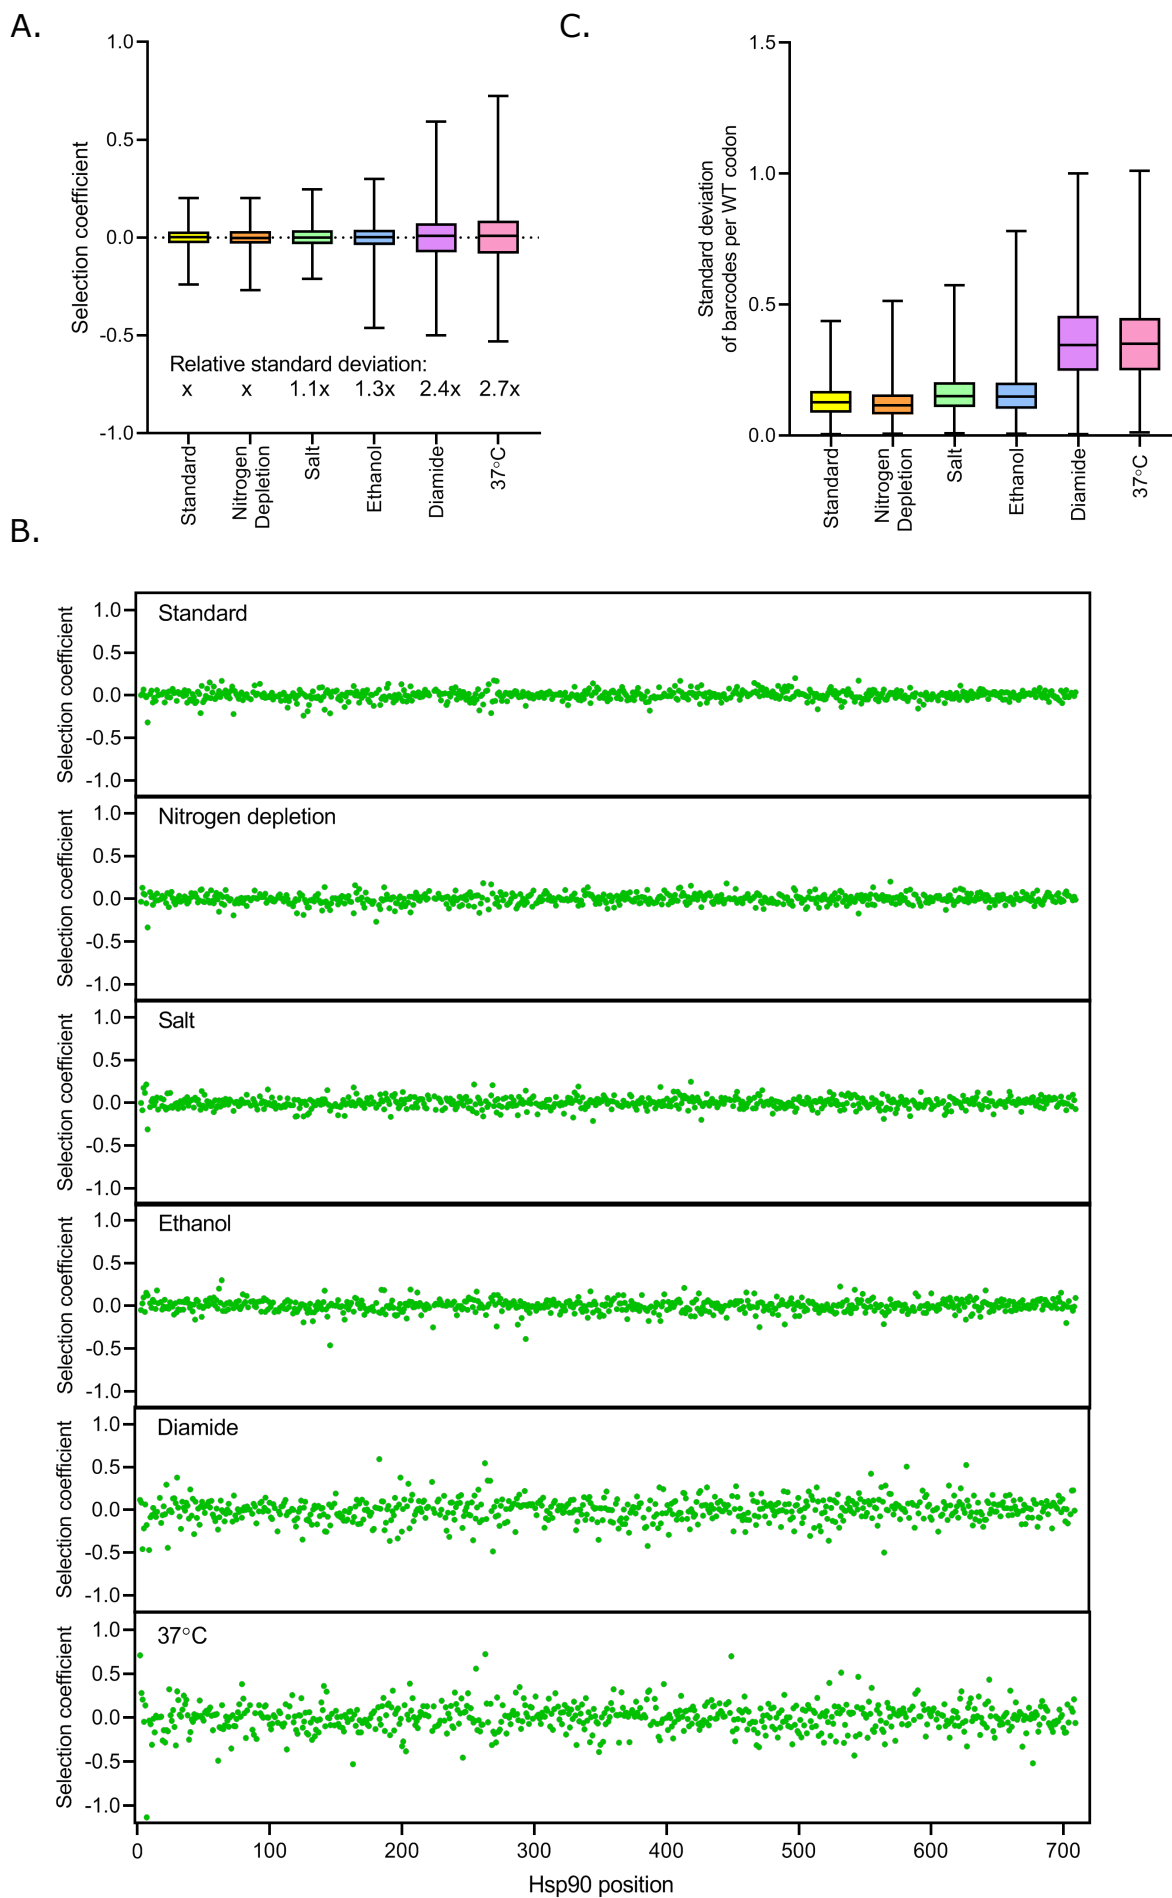

**Figure 2 – figure supplement 8.** A. Distribution of selection coefficients for the wildtype synonyms in each condition. The standard of deviation of wildtype synonyms in each condition relative to standard conditions (x) is specified under the corresponding box. B. The selection coefficient for wildtype synonyms at each position of Hsp90 in each condition. C. The variation of selection coefficients for barcodes with greater than 50 initial reads for each wildtype codon in each condition.
