# Supplementary material for: Comprehensive fitness maps of Hsp90 show widespread environmental dependence
Source: eLife journal article supplement (doi:10.7554/elife.53810), 2020-03-04
Supplement: supp [file elife-53810-supp-v1.zip]

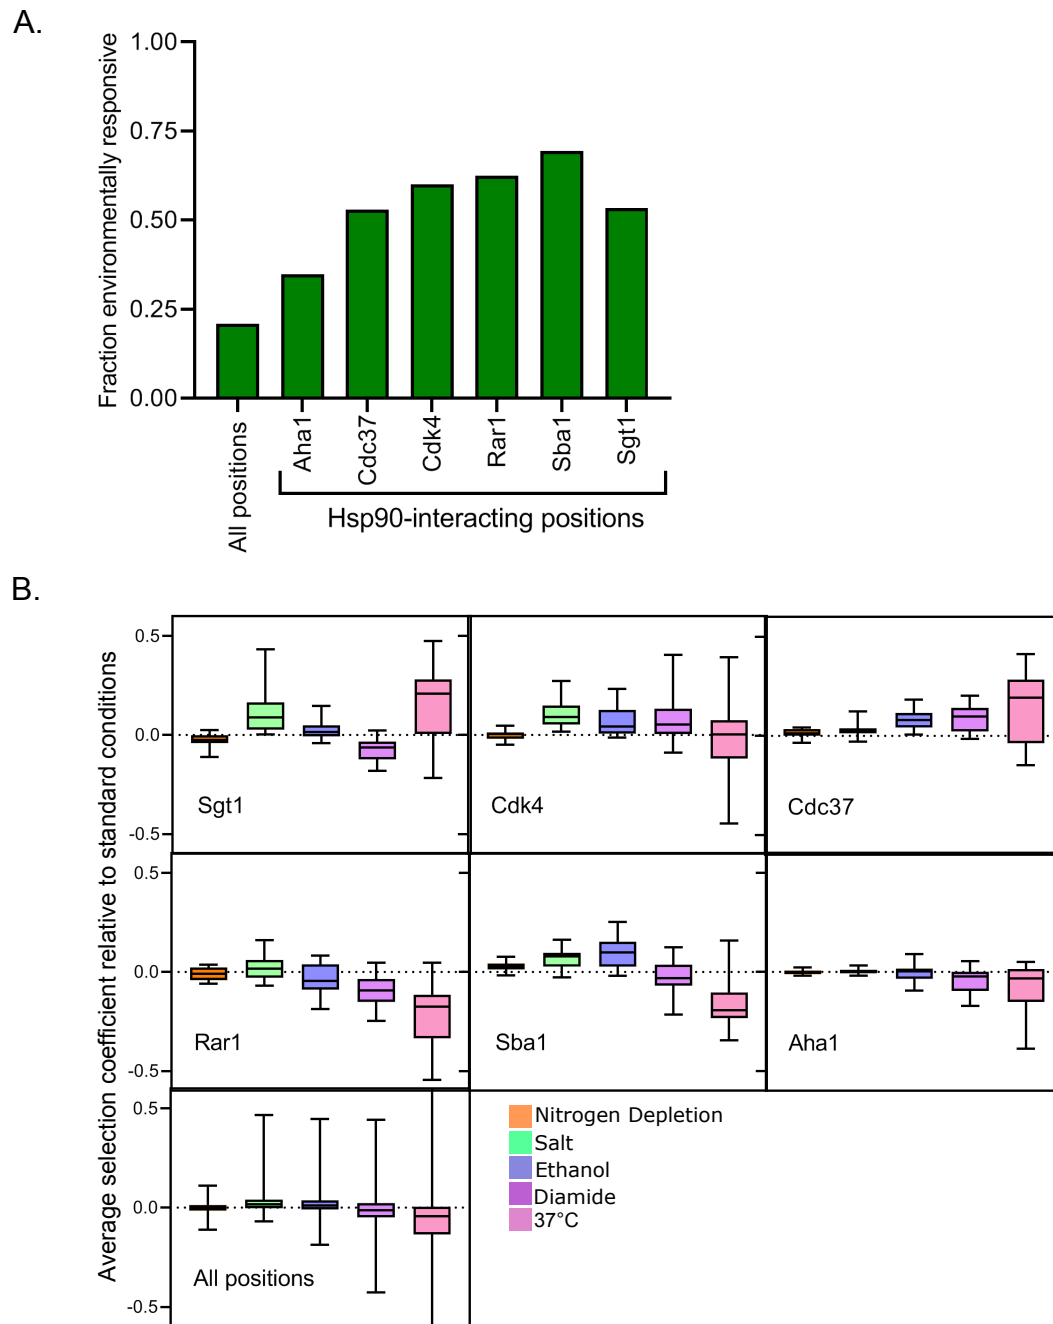

**Figure 3 – figure supplement 2.** A. The fraction of Hsp90 positions at interfaces that were categorized as environmentally responsive. B. The average selection coefficient in each environment relative to standard at all the Hsp90 positions at each stated interface.
