# Supplementary material for: Comprehensive fitness maps of Hsp90 show widespread environmental dependence
Source: eLife journal article supplement (doi:10.7554/elife.53810), 2020-03-04
Supplement: supp [file elife-53810-supp-v1.zip]

Standard Replicate 1 (30°C)

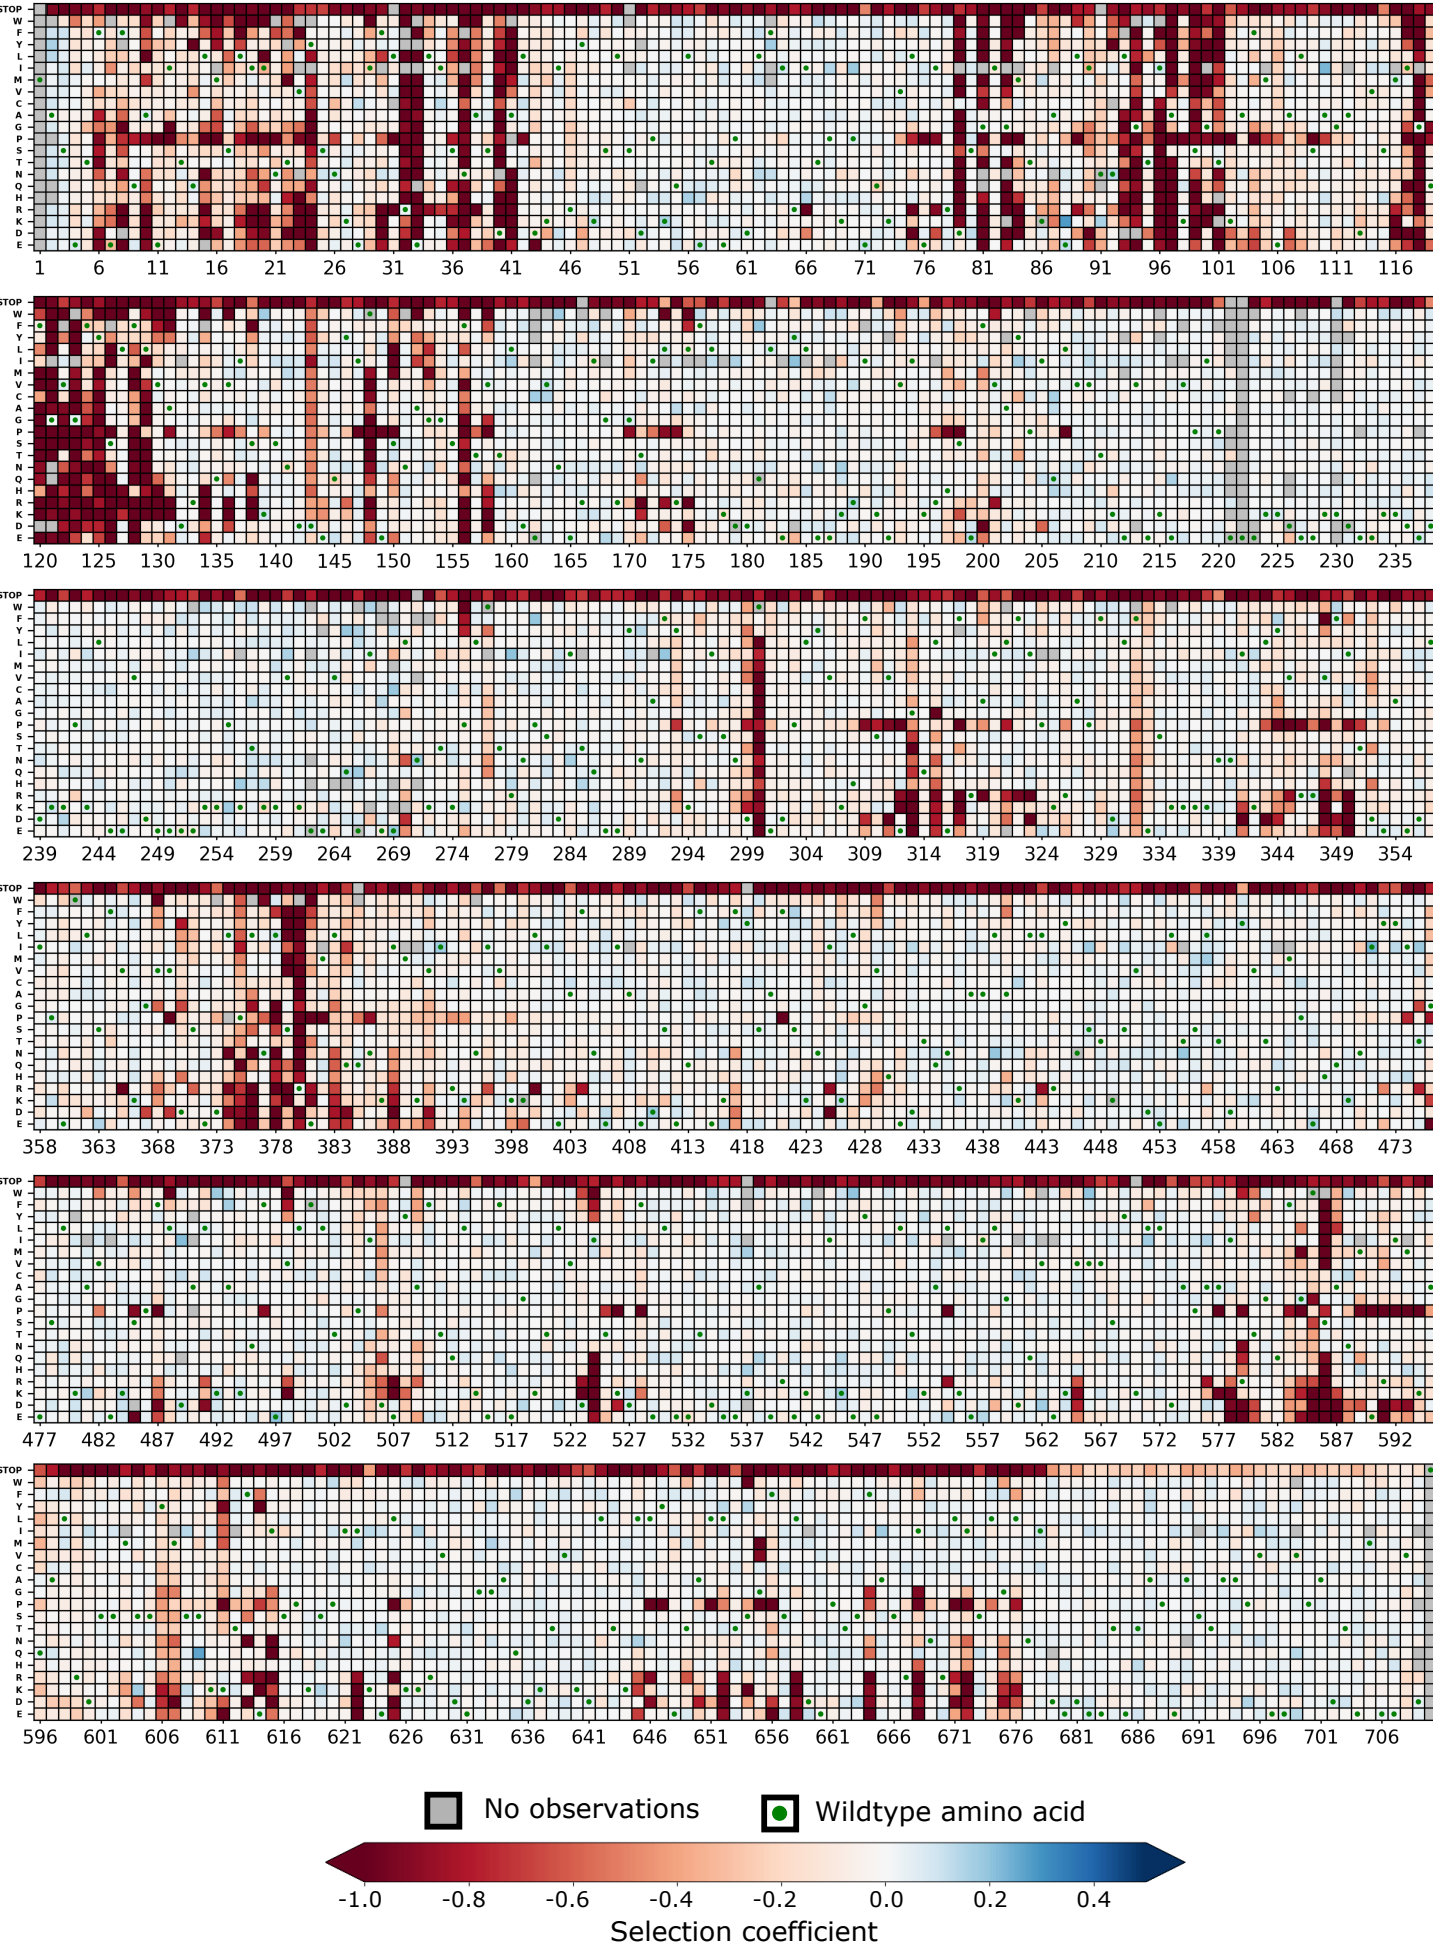

**Figure 1 – figure supplement 4.** Heatmap representation of the selection coefficients observed for single amino acid changes across amino acids 2-709 of Hsp90 in standard (30°C) conditions in replicate 1.
