# Supplementary material for: Comprehensive fitness maps of Hsp90 show widespread environmental dependence
Source: eLife journal article supplement (doi:10.7554/elife.53810), 2020-03-04
Supplement: supp [file elife-53810-supp-v1.zip]

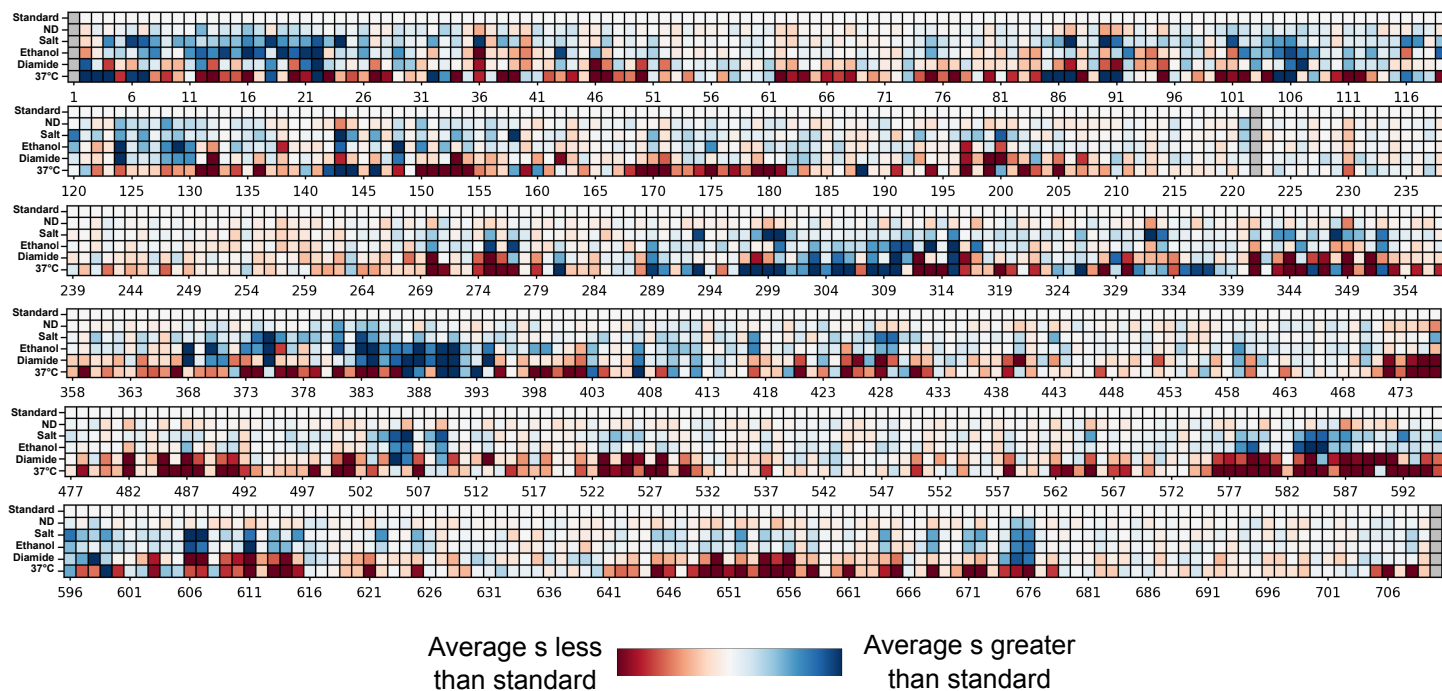

**Figure 3 – figure supplement 1.** Heatmap representation of the average selection coefficient ( $s$ ) at each position in each environmental condition relative to the average selection coefficient at the same position in standard conditions.
