# Supplementary material for: Comprehensive fitness maps of Hsp90 show widespread environmental dependence
Source: eLife journal article supplement (doi:10.7554/elife.53810), 2020-03-04
Supplement: supp [file elife-53810-supp-v1.zip]

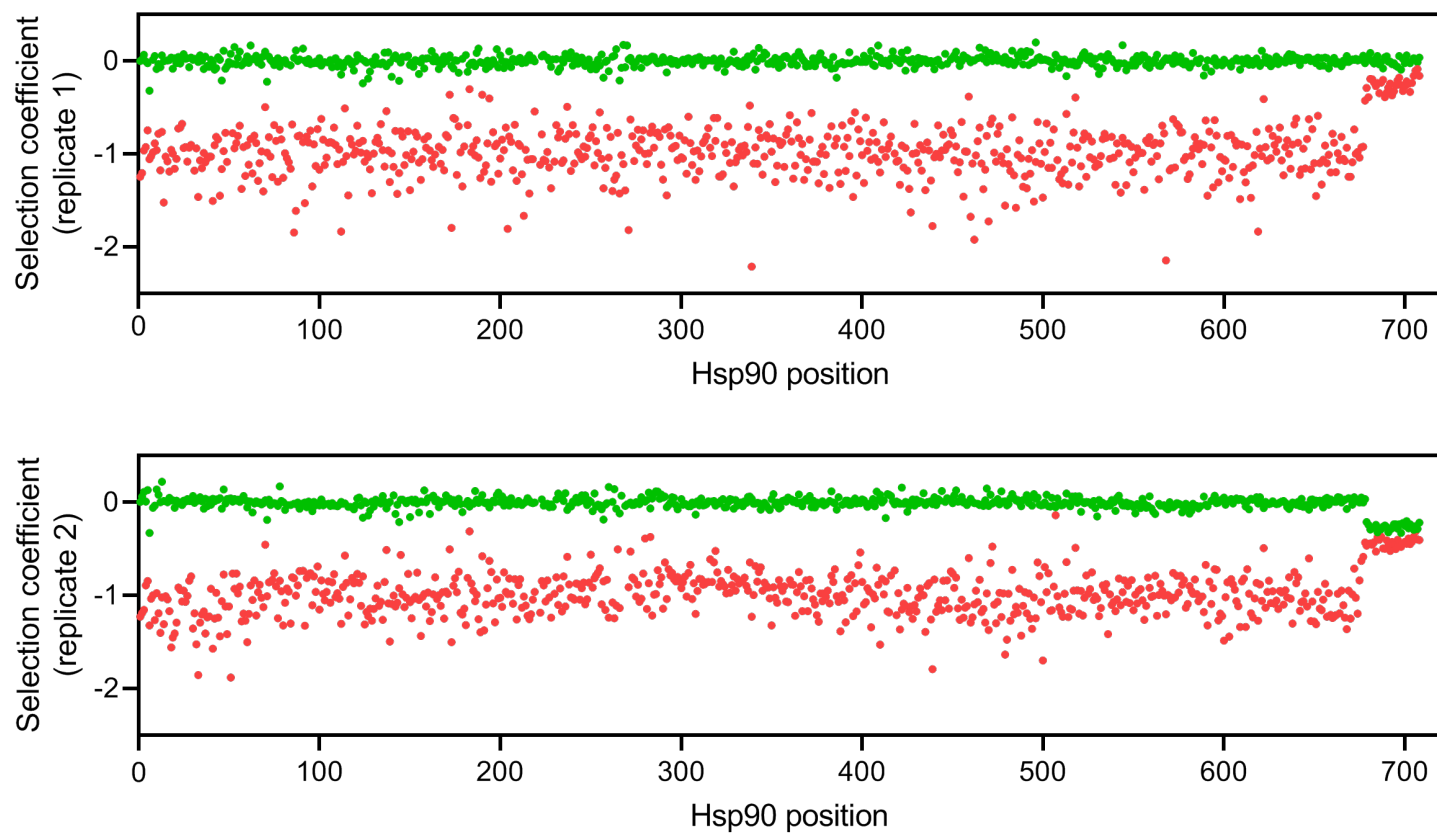

**Figure 1 – figure supplement 1.** Selection coefficients for wildtype synonyms (green) and stops (red) at each position of Hsp90 for both replicates of standard conditions.
