# Supplementary material for: Comprehensive fitness maps of Hsp90 show widespread environmental dependence
Source: eLife journal article supplement (doi:10.7554/elife.53810), 2020-03-04
Supplement: supp [file elife-53810-supp-v1.zip]

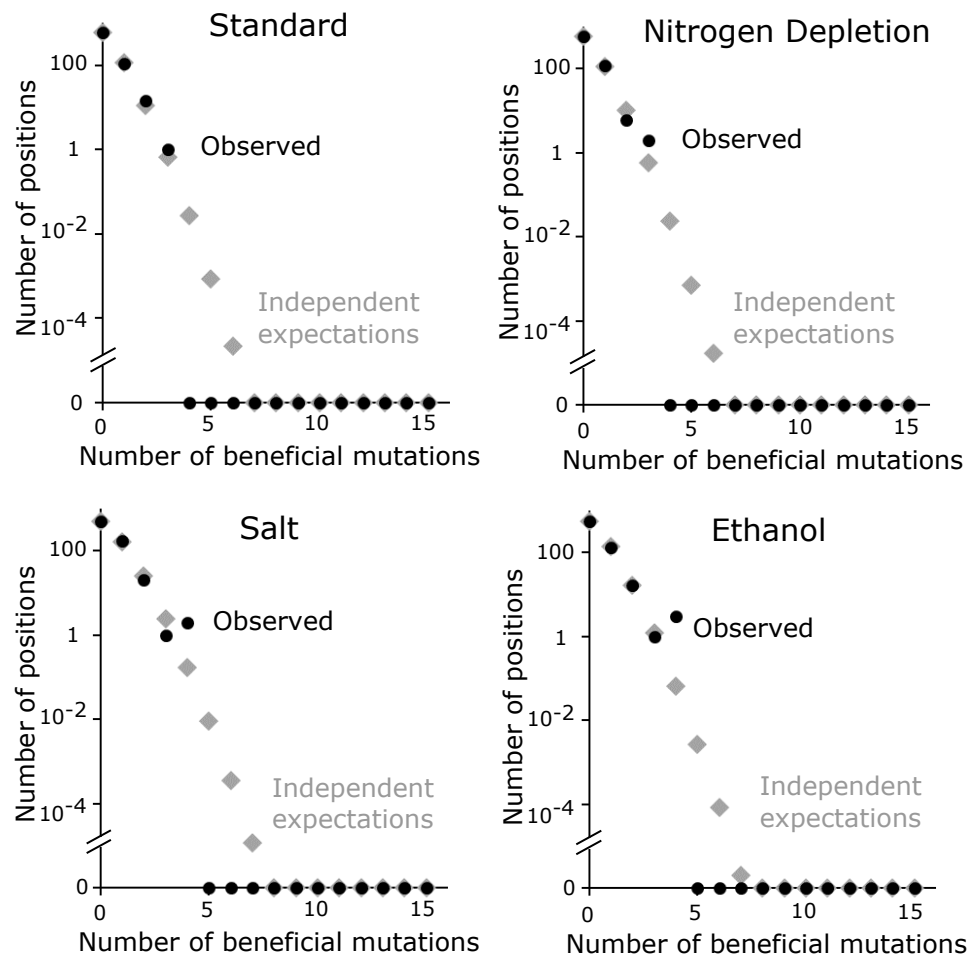

**Figure 5 – figure supplement 2.** Distribution of the number of beneficial mutations at the same position in standard, nitrogen depletion, salt, and ethanol conditions. Independent expectations were calculated as the probability of the stated number of mutations occurring at the same position by chance.
