# Supplementary material for: Comprehensive fitness maps of Hsp90 show widespread environmental dependence
Source: eLife journal article supplement (doi:10.7554/elife.53810), 2020-03-04
Supplement: supp [file elife-53810-supp-v1.zip]

A.

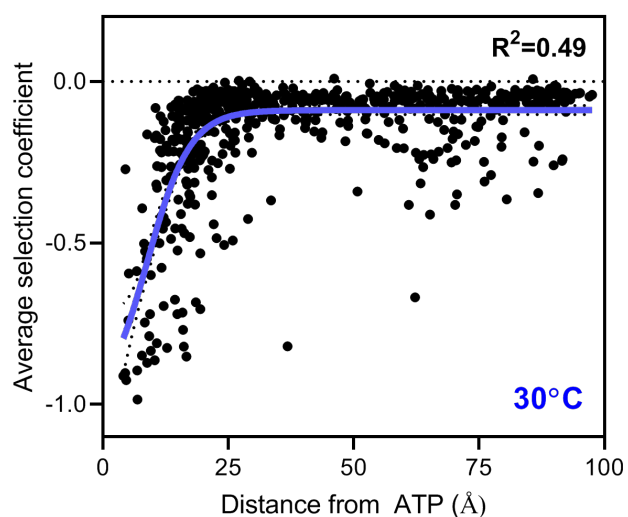

B.

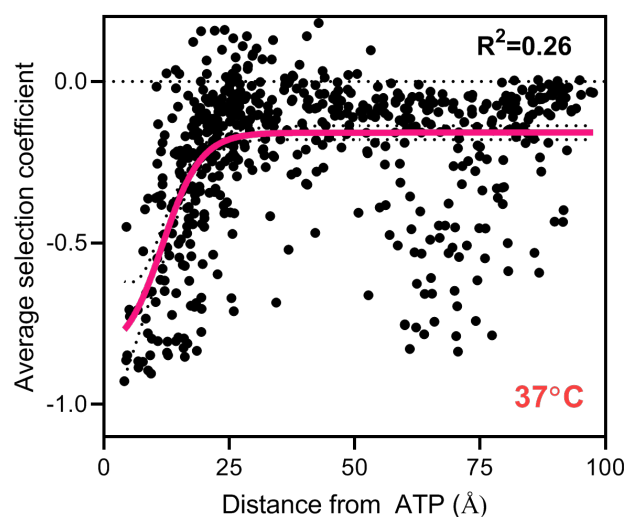

**Figure 1 – figure supplement 5.** A. The average selection coefficient at each position in standard (30°C) conditions correlates with distance to ATP ( $R^2 = 0.49$ ). B. The average selection coefficient at each position at 37°C does not correlate as well with distance to ATP as in standard conditions ( $R^2 = 0.26$ ). The data points were fit to a sigmoid function.
