# Supplementary material for: Comprehensive fitness maps of Hsp90 show widespread environmental dependence
Source: eLife journal article supplement (doi:10.7554/elife.53810), 2020-03-04
Supplement: supp [file elife-53810-supp-v1.zip]

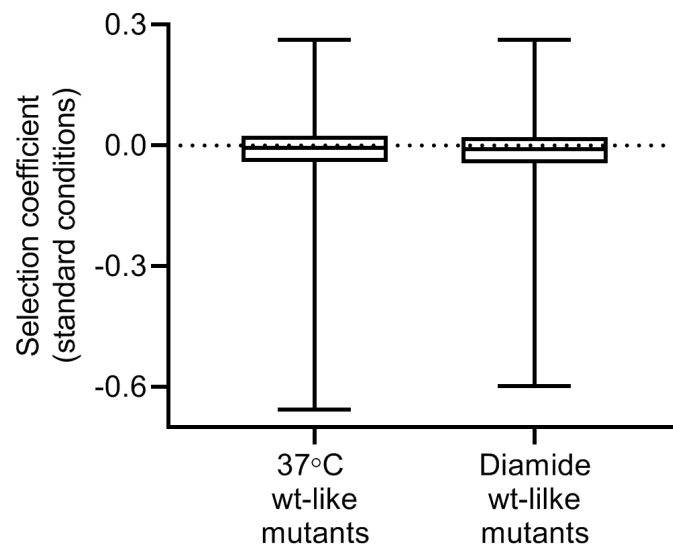

**Figure 5 – figure supplement 3.** Selection coefficients in standard conditions for all wildtype-like mutations at 37°C and in diamide.
