# Supplementary material for: Comprehensive fitness maps of Hsp90 show widespread environmental dependence
Source: eLife journal article supplement (doi:10.7554/elife.53810), 2020-03-04
Supplement: supp [file elife-53810-supp-v1.zip]

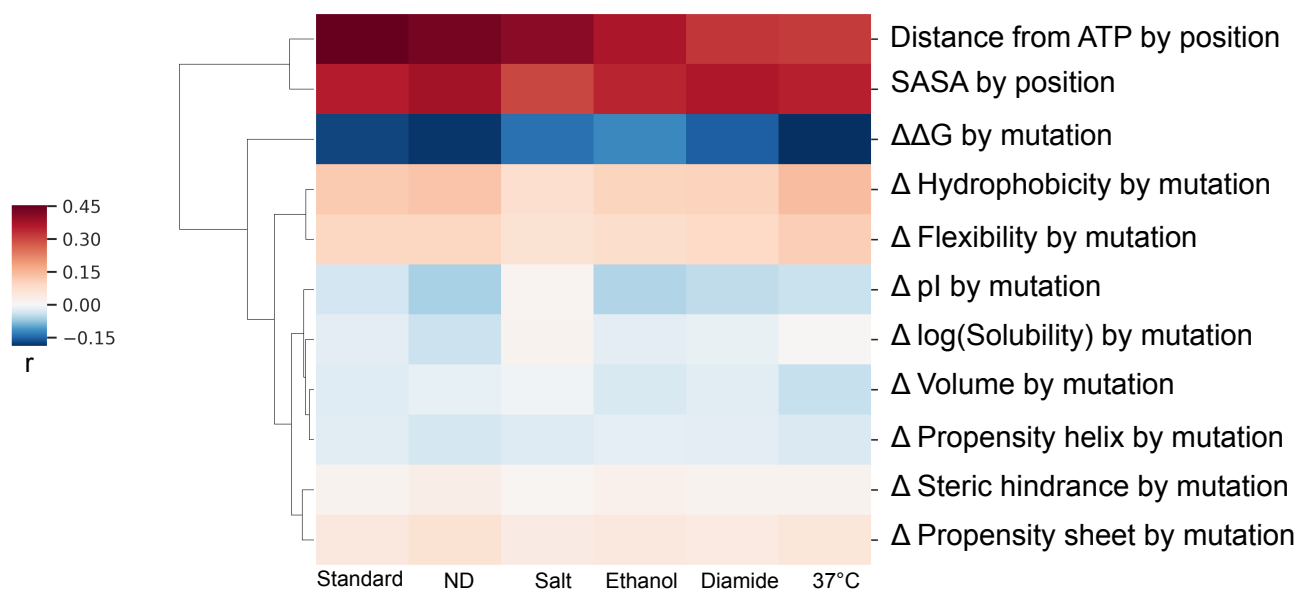

**Figure 6 – figure supplement 2.** Heatmap of Spearman's rank correlation coefficients ( $r$ ) between molecular features (rows) and selection coefficients per mutation or per position (average selection coefficient for all amino acids at the position) for each environment (columns). Euclidean clustering along rows is based on the Spearman's rank correlation coefficients. See Figure 6 – figure supplement 2, source data.
