# Supplementary material for: Comprehensive fitness maps of Hsp90 show widespread environmental dependence
Source: eLife journal article supplement (doi:10.7554/elife.53810), 2020-03-04
Supplement: supp [file elife-53810-supp-v1.zip]

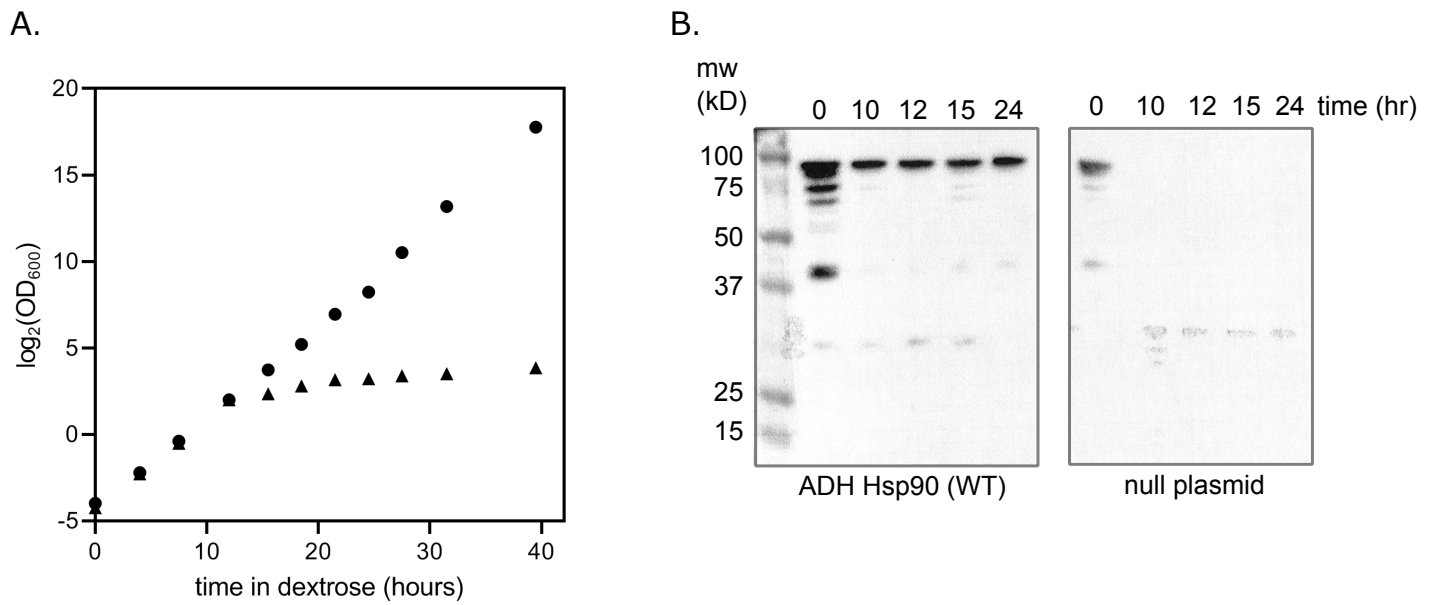

**Figure 6 - figure supplement 3.** A. Growth of Hsp90 shutoff yeast harboring either wildtype (WT) Hsp90 under the ADH promoter (●) or a null plasmid (▲). Growth was monitored by optical density (OD) at 600 nm. B. Hsp90 expression in cells harboring the same plasmids grown in dextrose for the stated number of hours. Hsp90 protein levels were monitored by Western blotting.
