# Supplementary material for: Comprehensive fitness maps of Hsp90 show widespread environmental dependence
Source: eLife journal article supplement (doi:10.7554/elife.53810), 2020-03-04
Supplement: supp [file elife-53810-supp-v1.zip]

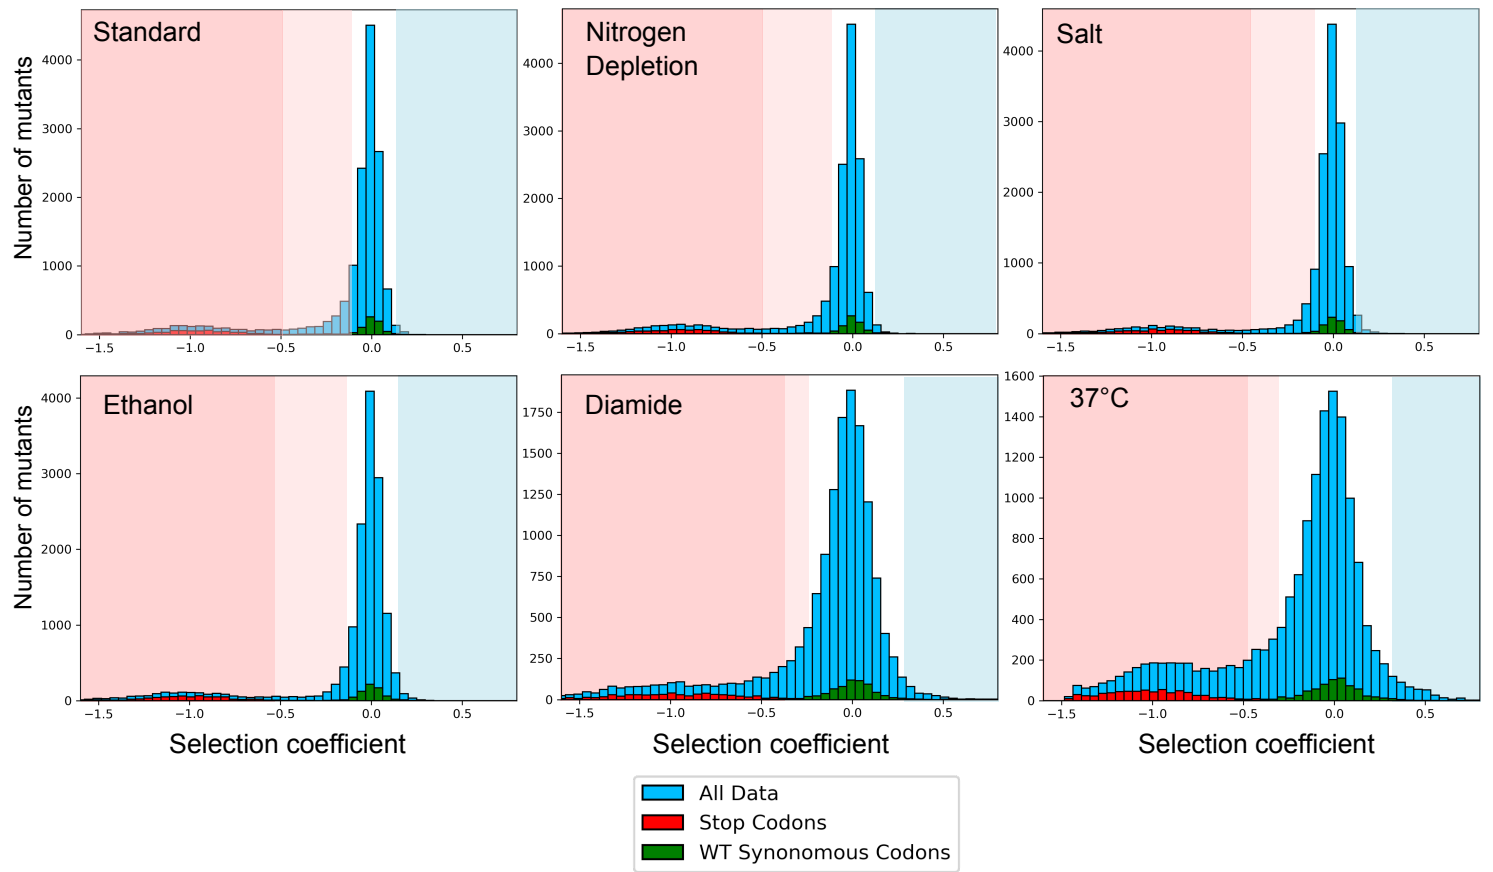

**Figure 2 – figure supplement 7.** Distribution of selection coefficients in each environmental condition. Mutations were categorized as beneficial (light blue shading), wildtype-like (white shading), intermediate (light pink shading) or deleterious (dark pink shading) based on the distribution of wildtype synonyms and stop codons in each condition.
