# Supplementary material for: Comprehensive fitness maps of Hsp90 show widespread environmental dependence
Source: eLife journal article supplement (doi:10.7554/elife.53810), 2020-03-04
Supplement: supp [file elife-53810-supp-v1.zip]

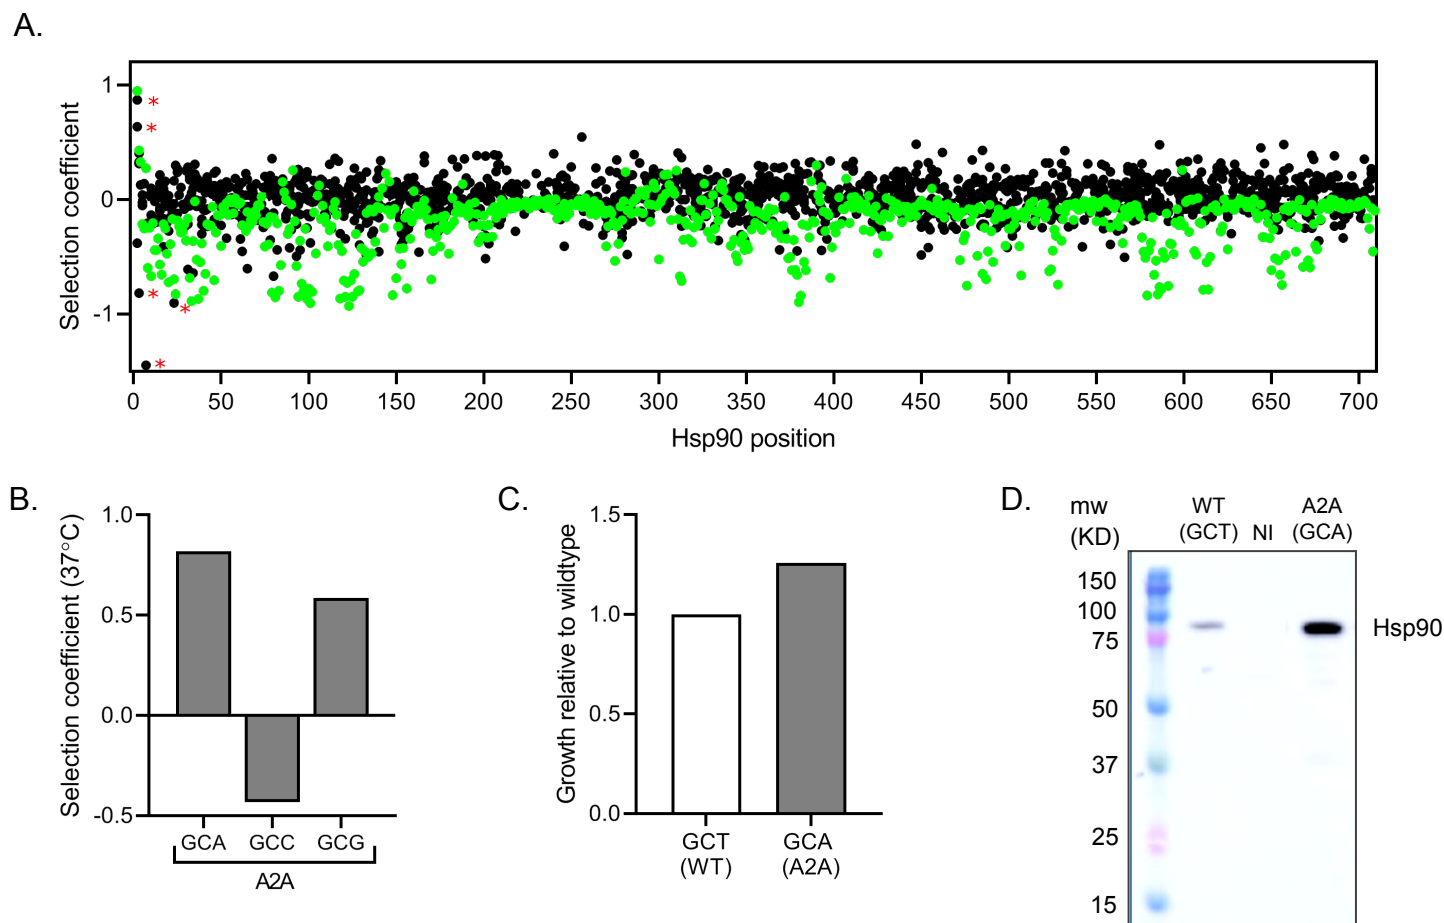

**Figure 5 – figure supplement 4.** A. Selection coefficients for all codon variants of synonymous mutations at each position of Hsp90 (black) at 37°C compared to the average selection coefficient of all mutations at each position (green) at 37°C. Synonymous mutations that were deemed beneficial or deleterious after a Bonferroni correction are noted with an asterisk. B. Selection coefficients for codon variants of synonymous mutants at position Ala2 show high variation. C. The individual Hsp90 variant containing the synonymous codon mutation GCT to GCA at position 2 exhibited an increased growth rate at 37°C. D. The individual synonymous mutant variant GCA at position 2 exhibited higher cellular expression levels at 37°C. WT: wildtype Hsp90 (GCT at 2nd position), NI: No insert, A2A: Hsp90 with the GCT to GCA codon mutation.
