# Supplementary material for: Comprehensive fitness maps of Hsp90 show widespread environmental dependence
Source: eLife journal article supplement (doi:10.7554/elife.53810), 2020-03-04
Supplement: supp [file elife-53810-supp-v1.zip]

Archive with 33 entries (33 files):
- elife_poa_e53810_Figure_1_figure_supplement_1.pdf
- elife_poa_e53810_Figure_6_figure_supplement_2.pdf
- elife_poa_e53810_Figure_2_figure_supplement_6.pdf
- elife_poa_e53810_Figure_5_figure_supplement_2.pdf
- elife_poa_e53810_Figure_2_figure_supplement_7.pdf
- elife_poa_e53810_Figure_1_figure_supplement_2.pdf
- elife_poa_e53810_Figure_1_figure_supplement_3.pdf
- elife_poa_e53810_Figure_5_source_data_1.xlsx
- elife_poa_e53810_Figure_2_figure_supplement_1.pdf
- elife_poa_e53810_Figure_1_figure_supplement_4.pdf
- elife_poa_e53810_Figure_1_source_data_2.xlsx
- elife_poa_e53810_Figure_6_figure_supplement_2_source_data_1.docx
- elife_poa_e53810_Figure_2_source_data_1.xlsx
- elife_poa_e53810_Figure_2_figure_supplement_5.pdf
- elife_poa_e53810_Figure_6_source_data_1.xlsx
- elife_poa_e53810_Figure_5_figure_supplement_4.pdf
- elife_poa_e53810_Figure_2_figure_supplement_2.pdf
- elife_poa_e53810_Figure_2_figure_supplement_4.pdf
- elife_poa_e53810_Figure_6_figure_supplement_1.pdf
- elife_poa_e53810_Figure_3_figure_supplement_2.pdf
- elife_poa_e53810_Figure_5_figure_supplement_1.pdf
- elife_poa_e53810_Figure_3_source_data_1.xlsx
- elife_poa_e53810_Figure_5_figure_supplement_3.pdf
- elife_poa_e53810_Transparent_Reporting_File.docx
- elife_poa_e53810_Figure_2_figure_supplement_8.pdf
- elife_poa_e53810_Figure_1_source_data_1.xlsx
- elife_poa_e53810_Figure_1_figure_supplement_5.pdf
- elife_poa_e53810_Figure_2_figure_supplement_3.pdf
- elife_poa_e53810_Figure_4_source_data_1.xlsx
- elife_poa_e53810_Figure_3_figure_supplement_1.pdf
- elife_poa_e53810_Figure_2_figure_supplement_9.pdf
- elife_poa_e53810_Figure_6_figure_supplement_3.pdf
- elife_poa_e53810_Supplementary_file_1.xlsx
