# Supplementary material for: Comprehensive fitness maps of Hsp90 show widespread environmental dependence
Source: eLife journal article supplement (doi:10.7554/elife.53810), 2020-03-04
Supplement: supp [file elife-53810-supp-v1.zip]

A.

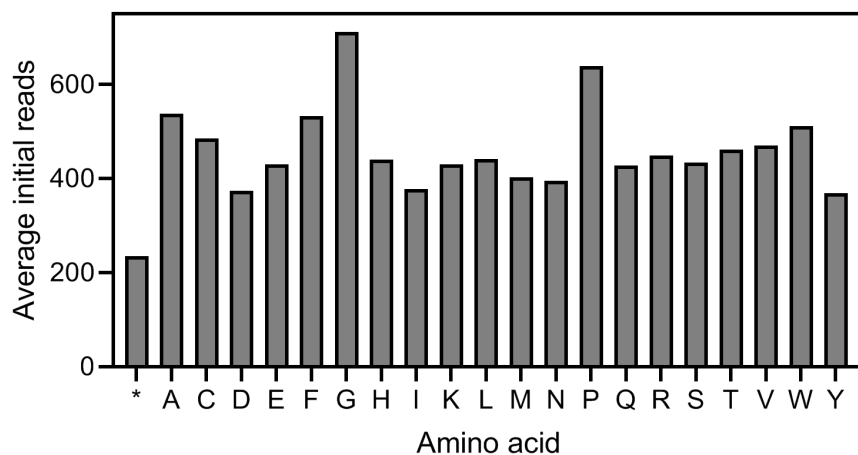

B.

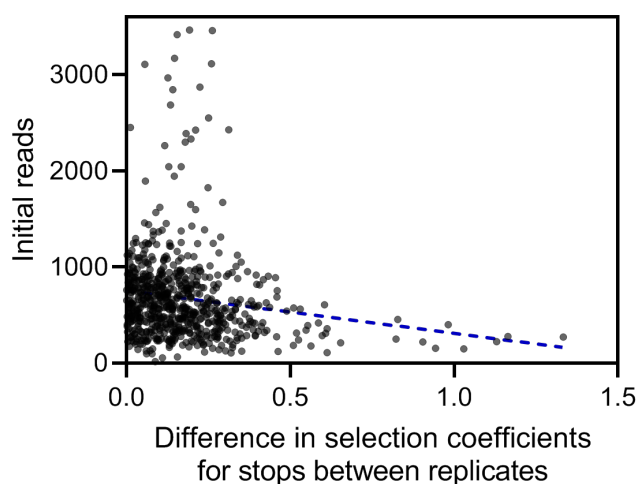

C.

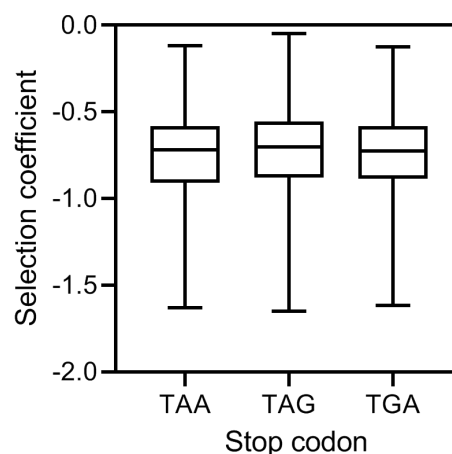

**Figure 1 – figure supplement 3.** A. The average initial reads measured per codon for each amino acid. B. The difference in the selection coefficients between stops in the two standard replicates compared to the initial reads for the corresponding stop in replicate 1. The blue dashed line indicates the line of best fit.  $R^2 = 0.022$ ,  $p < 0.0001$ . C. The distribution of selection coefficients for each stop codon in standard replicate 1.
