# Supplementary material for: Comprehensive fitness maps of Hsp90 show widespread environmental dependence
Source: eLife journal article supplement (doi:10.7554/elife.53810), 2020-03-04
Supplement: supp [file elife-53810-supp-v1.zip]

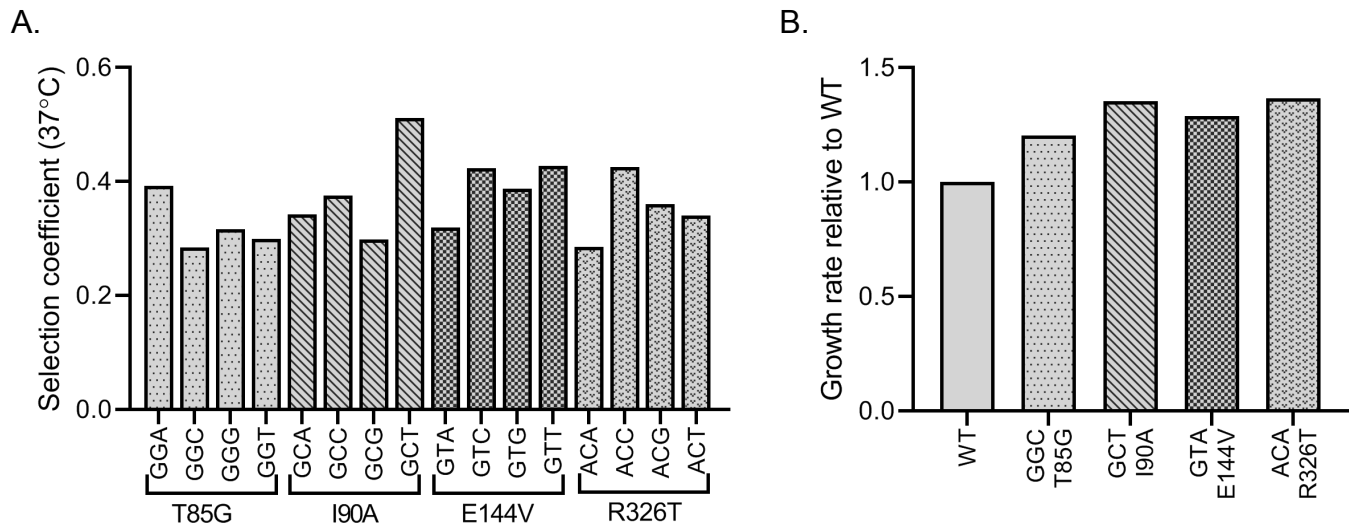

**Figure 5 – figure supplement 1.** A. Selection coefficients of synonymous codon variants for four amino acid mutants with beneficial selection coefficients at 37°C show high correlation. B. The same individual variants analyzed in isolation exhibit increased growth rates.
