# Supplementary material for: Comprehensive fitness maps of Hsp90 show widespread environmental dependence
Source: eLife journal article supplement (doi:10.7554/elife.53810), 2020-03-04
Supplement: supp [file elife-53810-supp-v1.zip › elife_poa_e53810_Figure_1_source_data_2.xlsx]

## Sheet: Sheet1
Position	WT aa	Avg s (Standard rep 1)
2	A	0.074336
3	S	-0.020833
4	E	-0.147364
5	T	-0.1031
6	F	-0.426175
7	E	-0.269944
8	F	-0.485488
9	Q	-0.152217
10	A	-0.532386
11	E	-0.213469
12	I	-0.248848
13	T	-0.195661
14	Q	-0.20977
15	L	-0.456402
16	M	-0.455279
17	S	-0.206746
18	L	-0.41071
19	I	-0.45586
20	I	-0.488004
21	N	-0.2463
22	T	-0.470153
23	V	-0.482297
24	Y	-0.715474
25	S	-0.064422
26	N	-0.15416
27	K	-0.060131
28	E	-0.113716
29	I	-0.213435
30	F	-0.329408
31	L	-0.124013
32	R	-0.863705
33	E	-0.984979
34	L	-0.163891
35	I	-0.082264
36	S	-0.393132
37	N	-0.895142
38	A	-0.31893
39	S	-0.107685
40	D	-0.833959
41	A	-0.695456
42	L	-0.099752
43	D	-0.150487
44	K	-0.11237
45	I	-0.031764
46	R	-0.158722
47	Y	-0.112918
48	K	-0.047591
49	S	-0.058967
50	L	-0.070393
51	S	-0.047463
52	D	-0.048844
53	P	-0.030993
54	K	-0.033818
55	Q	-0.04014
56	L	-0.030861
57	E	-0.035696
58	T	-0.06386
59	E	-0.051965
60	P	-0.068578
61	D	-0.055175
62	L	-0.02922
63	F	-0.029965
64	I	-0.083266
65	R	-0.036662
66	I	-0.117887
67	T	-0.042132
68	P	-0.030782
69	K	-0.063775
70	P	-0.054179
71	E	-0.017579
72	Q	-0.059669
73	K	-0.040547
74	V	-0.084902
75	L	-0.227751
76	E	-0.091617
77	I	-0.175331
78	R	-0.062497
79	D	-0.852148
80	S	-0.024224
81	G	-0.821581
82	I	-0.090451
83	G	-0.76908
84	M	-0.470259
85	T	-0.108755
86	K	-0.122845
87	A	-0.244165
88	E	-0.082899
89	L	-0.219188
90	I	-0.319602
91	N	-0.139078
92	N	-0.220257
93	L	-0.577078
94	G	-0.825644
95	T	-0.175028
96	I	-0.746289
97	A	-0.810666
98	K	-0.166901
99	S	-0.849
100	G	-0.548216
101	T	-0.720972
102	K	-0.198516
103	A	-0.079484
104	F	-0.264033
105	M	-0.185598
106	E	-0.197094
107	A	-0.128698
108	L	-0.114057
109	S	-0.11017
110	A	-0.055609
111	G	-0.119959
112	A	-0.101633
113	D	-0.132764
114	V	-0.080696
115	S	-0.071169
116	M	-0.26223
117	I	-0.501976
118	G	-0.903166
119	Q	-0.272019
120	F	-0.740308
121	G	-0.925418
122	V	-0.595011
123	G	-0.911789
124	F	-0.587208
125	Y	-0.789155
126	S	-0.600115
127	L	-0.265296
128	F	-0.676043
129	L	-0.720443
130	V	-0.379046
131	A	-0.356779
132	D	-0.056121
133	R	-0.047652
134	V	-0.348904
135	Q	-0.082221
136	V	-0.309549
137	I	-0.07579
138	S	-0.313572
139	K	-0.050811
140	S	-0.05819
141	N	-0.04263
142	D	-0.054969
143	D	-0.506669
144	E	-0.16078
145	Q	-0.045327
146	Y	-0.125391
147	I	-0.078536
148	W	-0.684182
149	E	-0.091948
150	S	-0.38135
151	N	-0.06018
152	A	-0.193721
153	G	-0.233478
154	G	-0.12486
155	S	-0.058856
156	F	-0.705603
157	T	-0.084912
158	V	-0.442193
159	T	-0.025545
160	L	-0.044424
161	D	-0.049545
162	E	-0.072064
163	V	-0.030143
164	N	-0.038712
165	E	-0.045833
166	R	0.002665
167	I	-0.055393
168	G	-0.067135
169	R	-0.056021
170	G	-0.187144
171	T	-0.18759
172	I	-0.084452
173	L	-0.230241
174	R	-0.127142
175	L	-0.265483
176	F	-0.04119
177	L	-0.056162
178	K	-0.054142
179	D	-0.055743
180	D	-0.088365
181	Q	-0.064666
182	L	-0.003624
183	E	-0.062979
184	Y	-0.032893
185	L	-0.044633
186	E	-0.058284
187	E	-0.045672
188	K	-0.038566
189	R	-0.058154
190	I	-0.064723
191	K	-0.019104
192	E	-0.067981
193	V	-0.132292
194	I	-0.058496
195	K	-0.031309
196	R	-0.114252
197	H	-0.173855
198	S	-0.216555
199	E	-0.085141
200	F	-0.226567
201	V	-0.179619
202	A	-0.071112
203	Y	-0.107642
204	P	-0.044957
205	I	-0.103079
206	Q	-0.027672
207	L	-0.084944
208	V	-0.038662
209	V	-0.031303
210	T	-0.040847
211	K	-0.064761
212	E	-0.051365
213	V	-0.055849
214	E	-0.04856
215	K	-0.068694
216	E	-0.045597
217	V	-0.055859
218	P	-0.044545
219	I	-0.036021
220	P	-0.022557
221	E	-0.038176
222	E	nan
223	E	-0.039725
224	K	-0.051802
225	K	-0.041634
226	D	-0.067859
227	E	-0.039424
228	E	-0.047006
229	K	-0.039695
230	K	0.036991
231	D	-0.068015
232	E	-0.046505
233	E	-0.04645
234	K	-0.024536
235	K	-0.037605
236	D	-0.053899
237	E	-0.048491
238	D	-0.004916
239	D	-0.028456
240	K	-0.045415
241	K	-0.024933
242	P	-0.062894
243	K	-0.032599
244	L	-0.04729
245	E	-0.044993
246	E	-0.058732
247	V	-0.044037
248	D	-0.058077
249	E	-0.058023
250	E	-0.030368
251	E	-0.033271
252	E	-0.020393
253	K	-0.036995
254	K	-0.053375
255	P	-0.027191
256	K	-0.024567
257	T	-0.022885
258	K	-0.046829
259	K	-0.026191
260	V	-0.013797
261	K	-0.046686
262	E	-0.050424
263	E	-0.060452
264	V	-0.052976
265	Q	-0.047149
266	E	-0.0133
267	I	-0.066914
268	E	-0.043911
269	E	-0.08412
270	L	-0.178546
271	N	-0.029891
272	K	-0.066835
273	T	-0.070263
274	K	-0.047864
275	P	-0.245375
276	L	-0.04736
277	W	-0.224869
278	T	-0.061423
279	R	-0.042653
280	N	-0.036145
281	P	-0.05327
282	S	-0.04339
283	D	-0.054378
284	I	-0.051246
285	T	-0.018885
286	Q	-0.047507
287	E	-0.035323
288	E	-0.040197
289	Y	-0.064459
290	N	-0.057933
291	A	-0.072827
292	F	-0.057607
293	Y	-0.220745
294	K	-0.050681
295	S	-0.085667
296	I	-0.070754
297	S	-0.076991
298	N	-0.129178
299	D	-0.368461
300	W	-0.820156
301	E	-0.118123
302	D	-0.075617
303	P	-0.104536
304	L	-0.055379
305	Y	-0.05757
306	V	-0.068285
307	K	-0.081182
308	H	-0.1021
309	F	-0.143989
310	S	-0.158404
311	V	-0.182332
312	E	-0.199099
313	G	-0.492466
314	Q	-0.06217
315	L	-0.351894
316	E	-0.067039
317	F	-0.273987
318	R	-0.069361
319	A	-0.147193
320	I	-0.099196
321	L	-0.173723
322	F	-0.101379
323	I	-0.165996
324	P	-0.098297
325	K	-0.064974
326	R	-0.128804
327	A	-0.048037
328	P	-0.0457
329	F	-0.094628
330	D	-0.06686
331	L	-0.056836
332	F	-0.375418
333	E	-0.204288
334	S	-0.067608
335	K	-0.06542
336	K	-0.052434
337	K	-0.067055
338	K	-0.030953
339	N	-0.029698
340	N	-0.035623
341	I	-0.19306
342	K	-0.051259
343	L	-0.223221
344	Y	-0.257356
345	V	-0.217161
346	R	-0.151361
347	R	-0.106845
348	V	-0.416867
349	F	-0.180454
350	I	-0.294679
351	T	-0.120786
352	D	-0.216623
353	E	-0.09288
354	A	-0.090104
355	E	-0.046128
356	D	-0.067487
357	L	-0.075851
358	I	-0.078573
359	P	-0.045741
360	E	-0.114378
361	W	-0.041116
362	L	-0.076858
363	S	-0.05438
364	F	-0.093814
365	V	-0.110365
366	K	-0.000303
367	G	-0.115382
368	V	-0.253038
369	V	-0.153253
370	D	-0.267832
371	S	-0.158144
372	E	-0.059188
373	D	-0.118503
374	L	-0.305986
375	P	-0.523042
376	L	-0.420839
377	N	-0.17831
378	L	-0.500476
379	S	-0.526172
380	R	-0.871184
381	E	-0.435522
382	M	-0.140424
383	L	-0.366283
384	Q	-0.270553
385	Q	-0.084233
386	N	-0.15663
387	K	-0.107794
388	I	-0.29705
389	M	-0.120259
390	K	-0.107812
391	V	-0.220834
392	I	-0.078102
393	R	-0.071985
394	K	-0.130315
395	N	-0.08795
396	I	-0.122046
397	V	-0.038939
398	K	-0.118345
399	K	-0.094389
400	L	-0.115703
401	I	-0.052245
402	E	-0.042181
403	A	-0.089104
404	F	-0.120443
405	N	-0.037855
406	E	-0.048057
407	I	-0.094264
408	A	-0.047666
409	E	-0.076791
410	D	-0.091654
411	S	-0.071401
412	E	-0.08128
413	Q	-0.026688
414	F	-0.054579
415	E	-0.064229
416	K	-0.052516
417	F	-0.157486
418	Y	0.009237
419	S	-0.060543
420	A	-0.05651
421	F	-0.120246
422	S	-0.057589
423	K	-0.047016
424	N	-0.112683
425	I	-0.155044
426	K	-0.057735
427	L	-0.092911
428	G	-0.144125
429	V	-0.174147
430	H	-0.056391
431	E	-0.119765
432	D	-0.040848
433	T	-0.06148
434	Q	-0.05208
435	N	-0.059818
436	R	-0.035793
437	A	-0.038857
438	A	-0.052809
439	L	-0.057332
440	A	-0.127364
441	K	-0.046075
442	L	-0.085585
443	L	-0.121165
444	R	-0.056857
445	Y	-0.062673
446	N	-0.061123
447	S	-0.046784
448	T	-0.04384
449	K	-0.044983
450	S	-0.013132
451	V	-0.045135
452	D	-0.031934
453	E	-0.038063
454	L	-0.068392
455	T	-0.04699
456	S	-0.00657
457	L	-0.063946
458	T	-0.050702
459	D	-0.078175
460	Y	-0.022494
461	V	-0.056699
462	T	-0.068299
463	R	-0.07218
464	M	-0.05308
465	P	-0.044366
466	E	-0.028919
467	H	-0.067645
468	Q	-0.063076
469	K	-0.039152
470	N	-0.083548
471	I	-0.053264
472	Y	-0.051298
473	Y	-0.027641
474	I	-0.082075
475	T	-0.119524
476	G	-0.207165
477	E	-0.052359
478	S	-0.045258
479	L	-0.049497
480	K	-0.041233
481	A	-0.04634
482	V	-0.115777
483	E	-0.054021
484	K	-0.022812
485	S	-0.154993
486	P	-0.061188
487	F	-0.244028
488	L	-0.11782
489	D	-0.030411
490	A	-0.080868
491	L	-0.163192
492	K	-0.029004
493	A	-0.062127
494	K	-0.058377
495	N	-0.058722
496	F	-0.102339
497	E	-0.07234
498	V	-0.2399
499	L	-0.058877
500	F	-0.038772
501	L	-0.056166
502	T	-0.035883
503	D	-0.08593
504	P	-0.117395
505	I	-0.138214
506	D	-0.340783
507	E	-0.161644
508	Y	-0.076778
509	A	-0.184937
510	F	-0.063212
511	T	-0.054859
512	Q	-0.064622
513	L	-0.061257
514	K	-0.046563
515	E	-0.05367
516	F	-0.034763
517	E	-0.054942
518	G	-0.032421
519	K	-0.01276
520	T	-0.051092
521	L	-0.045216
522	V	-0.062817
523	D	-0.2205
524	I	-0.412151
525	T	-0.126005
526	K	-0.17755
527	D	-0.060891
528	F	-0.183856
529	E	-0.039619
530	L	-0.05844
531	E	-0.068042
532	E	-0.061143
533	T	-0.042898
534	D	-0.031071
535	E	-0.023068
536	E	-0.031105
537	K	0.007288
538	A	-0.039188
539	E	-0.039912
540	R	-0.056444
541	E	-0.041183
542	K	-0.056996
543	E	-0.071896
544	I	-0.040943
545	K	-0.012748
546	E	-0.034169
547	Y	-0.067006
548	E	-0.057048
549	P	-0.043901
550	L	-0.064717
551	T	-0.039214
552	K	-0.03949
553	A	-0.052377
554	L	-0.157451
555	K	-0.044818
556	E	-0.043681
557	I	-0.036323
558	L	-0.079785
559	G	-0.046538
560	D	-0.034603
561	Q	-0.056794
562	V	-0.025155
563	E	-0.057814
564	K	-0.067295
565	V	-0.172549
566	V	-0.040988
567	V	-0.046597
568	S	-0.048545
569	Y	-0.049384
570	K	-0.01556
571	L	-0.066953
572	L	-0.046676
573	D	-0.025759
574	A	-0.059656
575	P	-0.054216
576	A	-0.087694
577	A	-0.141107
578	I	-0.19631
579	R	-0.34981
580	T	-0.15034
581	G	-0.076193
582	Q	-0.082657
583	F	-0.227083
584	G	-0.316007
585	W	-0.382298
586	S	-0.668822
587	A	-0.265599
588	N	-0.084714
589	M	-0.205767
590	E	-0.145906
591	R	-0.207457
592	I	-0.191289
593	M	-0.180929
594	K	-0.125516
595	A	-0.09785
596	Q	-0.160389
597	A	-0.0986
598	L	-0.082199
599	R	-0.135031
600	D	-0.08922
601	S	-0.059993
602	S	-0.068097
603	M	-0.125314
604	S	-0.094056
605	S	-0.060185
606	Y	-0.342015
607	M	-0.343347
608	S	-0.056563
609	S	-0.085706
610	K	-0.115151
611	K	-0.382376
612	T	-0.069187
613	F	-0.249387
614	E	-0.289514
615	I	-0.364823
616	S	-0.070342
617	P	-0.072065
618	K	-0.044852
619	S	-0.031407
620	P	-0.03824
621	I	-0.074291
622	I	-0.199204
623	K	-0.01655
624	E	-0.039676
625	L	-0.260077
626	K	-0.065263
627	K	-0.035842
628	R	-0.038074
629	V	-0.048326
630	D	-0.046946
631	E	-0.041531
632	G	-0.037386
633	G	-0.037162
634	A	-0.04529
635	Q	-0.039629
636	D	-0.049357
637	K	-0.034744
638	T	-0.048401
639	V	-0.03399
640	K	-0.027901
641	D	-0.026055
642	L	-0.065112
643	T	-0.047132
644	K	-0.048844
645	L	-0.119787
646	L	-0.202296
647	Y	-0.106376
648	E	-0.057036
649	T	-0.123741
650	A	-0.139697
651	L	-0.118486
652	L	-0.250554
653	T	-0.027192
654	S	-0.20578
655	G	-0.225653
656	F	-0.240624
657	S	-0.026609
658	L	-0.217713
659	D	-0.054735
660	E	-0.036993
661	P	-0.042865
662	T	-0.034919
663	S	-0.029218
664	F	-0.310111
665	A	-0.054166
666	S	-0.036808
667	R	-0.066831
668	I	-0.367706
669	N	-0.048149
670	R	-0.042137
671	L	-0.248212
672	I	-0.345904
673	S	-0.03359
674	L	-0.094022
675	G	-0.240985
676	L	-0.245936
677	N	-0.056281
678	I	-0.03309
679	D	-0.023172
680	E	-0.006717
681	D	-0.022803
682	E	-0.000484
683	E	-0.007328
684	T	-0.009216
685	E	-0.017761
686	T	-0.006644
687	A	-0.002893
688	P	-0.01107
689	E	-0.004579
690	A	-0.026336
691	S	-0.019228
692	T	-0.007751
693	A	-0.006367
694	A	-0.038601
695	P	-0.01976
696	V	-0.005633
697	E	-0.011835
698	E	0.004374
699	V	-0.007682
700	P	-0.006943
701	A	-0.011832
702	D	0.004704
703	T	-0.01244
704	E	-0.014959
705	M	-0.025374
706	E	-0.024279
707	E	-0.004276
708	V	-0.065566
709	D	-0.023262
