# Supplementary material for: Comprehensive fitness maps of Hsp90 show widespread environmental dependence
Source: eLife journal article supplement (doi:10.7554/elife.53810), 2020-03-04
Supplement: supp [file elife-53810-supp-v1.zip › elife_poa_e53810_Figure_3_source_data_1.xlsx]

## Sheet: Sheet1
		Average selection coefficient relative to standard conditions
Position	WT aa	ND	Salt	Ethanol	Diamide	37°C
2	A	-0.019733	-0.048216	-0.079936	0.148224	0.874553
3	S	0.022037	-0.017032	-0.014746	0.030253	0.449313
4	E	-0.000508	0.144324	0.049275	-0.130234	0.474599
5	T	0.020925	0.047489	0.049748	-0.014322	-0.110255
6	F	0.024034	0.172243	0.018564	-0.075162	0.173232
7	E	-0.024535	0.133862	0.071365	0.047884	0.543083
8	F	0.014497	0.062146	0.091291	0.003642	-0.111702
9	Q	0.024218	0.030479	0.021062	-0.070055	-0.095133
10	A	-0.004357	0.092622	-0.007285	-0.070322	-0.136782
11	E	0.004293	0.097695	0.120662	0.036674	0.007946
12	I	0.077068	-0.012318	0.105756	0.064278	-0.193118
13	T	0.018854	0.069814	0.130715	-0.112153	-0.244946
14	Q	0.035892	0.077811	0.178717	0.014334	-0.130578
15	L	0.027365	0.078769	0.097271	-0.052505	-0.111486
16	M	0.075189	0.118015	0.252369	0.036761	-0.200213
17	S	0.043358	0.093198	0.152682	0.036334	-0.007972
18	L	-0.017967	0.163881	0.02678	0.111801	0.158547
19	I	0.070599	0.099665	0.166962	0.012842	-0.017718
20	I	0.046574	0.081444	0.139567	-0.113158	-0.234969
21	N	0.023564	0.08917	0.165016	0.12454	-0.142772
22	T	0.033509	0.165854	0.242524	0.227631	0.300684
23	V	0.023003	0.063574	0.002293	-0.04039	-0.212636
24	Y	0.012359	0.175671	0.033469	-0.00579	-0.110236
25	S	-0.001405	-0.006803	0.017163	-0.036575	-0.119212
26	N	0.051216	0.087748	0.101047	0.003942	-0.082656
27	K	-0.017909	-0.026258	0.005803	-0.104763	-0.228313
28	E	-0.014603	0.034752	0.029377	-0.003938	-0.166506
29	I	0.031114	0.048948	0.118749	0.091672	-0.003302
30	F	0.018299	0.020971	0.038896	0.053186	-0.02801
31	L	0.044523	-0.021214	-0.061158	-0.073308	-0.042466
32	R	0.014047	0.107326	-0.059082	-0.000719	0.180316
33	E	0.065748	0.00579	0.020851	0.023959	0.098711
34	L	0.033381	0.045023	0.020768	0.008991	-0.199102
35	I	-0.008478	-0.007026	-0.040314	-0.023856	0.065824
36	S	-0.029343	0.16142	-0.186758	-0.151433	-0.132377
37	N	-0.021812	-0.051549	-0.029214	-0.015028	0.028425
38	A	0.035402	0.074873	-0.038903	-0.004303	-0.228779
39	S	-0.008248	0.044912	-0.055394	-0.035785	-0.274274
40	D	-0.044847	-0.062081	-0.092114	-0.066731	0.037028
41	A	0.073738	0.019087	-0.021706	0.02445	0.046105
42	L	0.012153	0.026507	-0.015965	-0.030629	-0.114734
43	D	0.025397	0.05452	0.11665	0.040295	-0.077061
44	K	0.037578	0.016475	0.039362	0.046727	-0.114254
45	I	-0.022319	-0.012806	-0.012198	-0.029599	-0.031764
46	R	-0.016556	-0.028519	0.083147	-0.247618	-0.545706
47	Y	0.022634	0.060641	-0.045134	-0.092681	-0.17456
48	K	0.013526	-0.00519	-0.006152	0.045916	-0.088993
49	S	0.015055	0.015505	0.020431	-0.003503	-0.079076
50	L	-0.006405	0.006914	0.031873	-0.118135	-0.335474
51	S	0.030962	-0.000389	0.042132	0.058672	-0.01544
52	D	0.043584	-0.012978	0.002259	-0.055039	-0.053284
53	P	-0.02167	-0.015891	-0.025011	0.035007	0.000538
54	K	0.002445	-0.007859	-0.004564	-0.006507	-0.102102
55	Q	0.001801	0.002014	0.003013	0.016434	0.040924
56	L	-0.01674	0.018147	-0.016008	0.011775	0.006417
57	E	-0.017565	-0.002244	-0.018703	0.044453	-0.084731
58	T	0.028392	0.004358	0.003124	0.039661	0.075341
59	E	-0.003117	0.019328	0.01098	-0.018238	0.018034
60	P	0.020532	0.027887	0.020906	-0.010305	0.026913
61	D	0.002378	0.001094	0.010233	0.063848	0.027127
62	L	-0.030649	-0.024159	-0.022916	-0.051304	-0.193706
63	F	-0.025128	-0.032878	-0.002383	-0.05283	-0.199333
64	I	-0.012284	0.012452	0.013804	0.007679	-0.191575
65	R	-0.001848	-0.022032	-0.005203	0.000449	-0.071769
66	I	-0.00424	0.02329	0.014821	-0.031218	-0.11133
67	T	0.006821	-0.017831	-0.000673	-0.037338	-0.132711
68	P	-0.025282	-0.003627	-0.008038	-0.055132	-0.160488
69	K	0.008127	-0.00677	0.027206	0.058205	-0.039522
70	P	-0.002261	-0.009143	0.005943	0.016602	-0.083224
71	E	-0.003149	-0.016747	-0.011632	-0.025902	-0.030983
72	Q	-0.008238	0.017479	-0.016768	-0.002642	0.005535
73	K	0.005012	0.003196	0.035288	0.059855	0.064721
74	V	0.009454	0.032406	0.040392	-0.024905	-0.112226
75	L	0.011466	0.069698	0.092588	-0.032723	-0.183094
76	E	0.003672	0.048077	0.032448	-0.055331	-0.121179
77	I	-0.003998	0.007175	0.004353	-0.029156	-0.216492
78	R	0.023421	0.005972	-0.002798	0.033497	-0.088005
79	D	0.002529	0.036323	-0.03569	-0.005791	0.040503
80	S	-0.033915	-0.017091	-0.009513	-0.044954	-0.134496
81	G	-0.01594	-0.00296	-0.062894	-0.024535	-0.030993
82	I	0.020655	0.025001	0.037562	0.018469	-0.117965
83	G	0.02888	-0.004321	-0.035051	-0.039387	-0.026742
84	M	0.058969	0.073074	-0.040827	-0.034301	-0.100804
85	T	0.005455	0.066447	0.013103	0.023847	0.264622
86	K	-0.036874	0.083272	0.005989	-0.067606	0.187455
87	A	-0.015004	0.190823	0.049013	-0.141288	0.243997
88	E	-0.014015	0.021394	-0.041571	-0.031799	-0.216336
89	L	0.025517	0.029081	0.042094	0.056592	-0.03568
90	I	-0.03668	0.210339	-0.04124	-0.097108	0.275895
91	N	-0.082015	0.140573	0.034551	-0.180747	0.395777
92	N	-0.058536	0.038809	0.115015	0.050881	0.030188
93	L	0.015447	0.044448	-0.059715	-0.060603	-0.002913
94	G	-0.017249	0.028357	-0.099133	-0.083724	-0.022595
95	T	-0.03771	0.070278	-0.016542	-0.096412	-0.186296
96	I	0.011692	0.013192	-0.038066	0.004727	0.012234
97	A	0.041421	0.067159	0.049772	0.081631	0.00643
98	K	0.00391	0.043528	0.035085	0.006469	-0.087987
99	S	0.030547	-0.001142	-0.02655	0.040745	-0.019121
100	G	0.036268	0.038182	-0.013485	-0.050832	-0.231597
101	T	0.077393	0.146416	-0.107779	-0.053001	-0.183854
102	K	0.023463	0.010881	0.110968	-0.02445	-0.607291
103	A	0.013351	0.029642	0.062578	0.095742	-0.034264
104	F	0.029836	0.08126	0.053847	-0.040178	-0.206751
105	M	0.008895	0.100611	0.130935	0.018454	0.22121
106	E	0.033359	0.123556	0.182274	0.154912	0.319849
107	A	0.040015	0.041176	0.096192	0.139853	-0.039864
108	L	0.013766	-0.001046	0.081849	-0.022434	0.061483
109	S	0.013322	0.019907	0.006097	0.028629	-0.044073
110	A	-0.022402	-0.028627	0.006456	0.003754	-0.146882
111	G	0.029522	0.024499	0.076421	0.079256	-0.288432
112	A	0.017197	0.015617	0.019843	0.031671	-0.167136
113	D	0.04895	0.039398	0.107093	0.038415	-0.101004
114	V	-0.020842	0.041344	0.026121	0.058929	0.003117
115	S	-0.020633	0.030982	0.023088	-0.036238	0.049864
116	M	-0.014065	0.119643	-0.082444	-0.025136	0.129996
117	I	0.023902	0.111388	-0.014268	-0.018172	0.105601
118	G	0.007339	-0.015946	-0.017026	-0.009749	0.039417
119	Q	-0.020717	0.055362	0.131871	0.014045	-0.178157
120	F	0.013594	0.146973	0.101532	0.035625	0.033856
121	G	0.034569	0.020121	0.014801	-0.014442	0.077187
122	V	-0.082245	0.020936	-0.099342	-0.067627	-0.133207
123	G	-0.014846	-0.009173	-0.026971	-0.025188	-0.016887
124	F	0.086432	0.111311	0.268138	0.254567	-0.120065
125	Y	0.04681	0.019581	0.018405	0.047321	-0.058494
126	S	0.020282	0.057998	0.059959	0.015136	-0.051029
127	L	0.021621	0.004919	0.032677	0.039528	-0.033884
128	F	0.110677	0.060587	0.129032	0.092105	-0.128199
129	L	0.052835	0.067801	0.446636	0.094117	-0.072253
130	V	0.047769	0.022502	0.108192	0.096404	-0.045186
131	A	0.026832	0.033462	-0.009994	0.002627	-0.18477
132	D	0.00501	0.010403	-0.09426	-0.160758	-0.394149
133	R	0.007695	-0.005387	0.003249	0.004693	-0.069155
134	V	-0.008028	-0.015256	0.025715	-0.033022	-0.154117
135	Q	0.016024	0.027535	0.023958	0.024556	-0.00274
136	V	0.032907	0.064622	0.029085	-0.034298	-0.161262
137	I	-0.015118	0.021141	0.042934	0.050554	-0.030485
138	S	-0.022228	-0.029289	-0.131283	-0.027893	-0.05556
139	K	-0.017208	-0.008049	-0.023506	-0.014528	-0.013522
140	S	0.000284	0.005763	-0.010646	0.014168	0.08202
141	N	-0.001097	0.020456	-0.010686	0.014374	-0.031965
142	D	-0.01537	0.003701	0.001996	-0.032839	0.153402
143	D	-0.110487	0.432793	0.147437	-0.165596	0.259221
144	E	-0.041559	0.104458	0.012002	-0.035462	0.388103
145	Q	0.010146	-0.019378	-0.016383	0.00387	-0.047808
146	Y	-0.002753	0.096333	0.048255	-0.057113	0.283081
147	I	-0.0057	-0.030029	-0.005742	0.020588	-0.052036
148	W	0.032599	0.050339	0.229707	0.11557	-0.150157
149	E	-0.007386	-0.006658	-0.018111	0.011676	0.009982
150	S	0.068606	0.031701	0.105608	-0.005433	-0.305087
151	N	0.057644	-0.017916	-0.019934	-0.051649	-0.176569
152	A	0.036877	0.012842	0.090023	0.002765	-0.233562
153	G	0.046986	0.108888	-0.015881	-0.215837	-0.332025
154	G	0.012162	0.034363	0.054484	-0.068798	-0.299006
155	S	0.01352	0.022515	0.005367	-0.027014	-0.098597
156	F	0.036003	0.073641	0.046332	-0.068256	-0.070457
157	T	0.022674	-0.000177	0.01667	-0.039949	-0.030513
158	V	0.020781	0.179515	0.023784	0.045673	0.099783
159	T	-0.004617	-0.008269	-0.049498	-0.015915	-0.16622
160	L	-0.036593	0.011569	0.025326	-0.048303	0.119041
161	D	-0.006842	0.020529	0.011431	-0.011713	-0.085293
162	E	0.004918	0.029971	-0.041166	-0.172946	0.011338
163	V	-0.040111	-0.037201	-0.024033	-0.037733	-0.037798
164	N	0.024825	-0.008791	-0.01494	0.036091	-0.090172
165	E	-0.01065	0.024886	0.020479	-0.006068	0.00053
166	R	0.008404	-0.039407	-0.036159	-0.014413	-0.010631
167	I	0.023861	0.000848	0.044412	0.002184	-0.031753
168	G	0.042913	0.007494	0.022544	0.015364	-0.104863
169	R	0.009427	-0.012953	0.000939	-0.026556	-0.240637
170	G	-0.013424	0.080177	0.050203	-0.064912	-0.510704
171	T	-0.035313	-0.034909	-0.015689	-0.086979	-0.261157
172	I	0.012336	0.030188	-0.003017	-0.027419	-0.080935
173	L	0.005115	0.053577	0.033394	0.048288	-0.098238
174	R	-0.001185	0.02221	0.020823	0.036462	-0.134841
175	L	0.025463	0.070202	0.084042	-0.015711	-0.143499
176	F	0.009358	-0.000225	-0.00872	0.005556	-0.110634
177	L	0.008591	-0.013725	-0.007524	0.025872	-0.153001
178	K	0.022973	0.016674	-0.042477	-0.025278	-0.086531
179	D	-0.011252	0.014	-0.024527	-0.067895	-0.207198
180	D	0.013472	0.012422	0.046291	0.000762	-0.384234
181	Q	0.031926	0.009001	0.026324	-0.000527	-0.164708
182	L	-0.070951	-0.054561	-0.014311	0.006429	0.017763
183	E	-0.000177	0.040782	0.053698	0.065699	-0.127631
184	Y	-0.029886	0.03562	0.016747	0.009049	-0.081238
185	L	-0.013585	-0.007642	0.003208	-0.020452	-0.008354
186	E	0.00043	0.01964	0.067424	0.049408	-0.003784
187	E	-0.007455	-0.021521	-0.013498	-0.034333	-0.066266
188	K	-0.007856	-0.019289	-0.013876	0.011082	0.172394
189	R	0.015222	-0.009846	0.005207	0.008882	-0.017884
190	I	0.02803	0.028679	0.01108	-0.028374	-0.034237
191	K	-0.002673	-0.059135	0.01975	-0.021556	-0.126031
192	E	0.003756	0.006346	0.031426	0.075693	0.027615
193	V	-0.006192	0.086939	-0.02004	-0.052335	0.011694
194	I	-0.024984	0.006572	0.002095	0.022597	-0.172116
195	K	0.009244	-0.007767	-0.026416	-0.021376	0.005398
196	R	0.031898	0.069265	-0.001906	0.02358	-0.011385
197	H	-0.029298	0.034996	-0.159909	-0.160682	-0.197202
198	S	0.008415	0.06247	-0.008053	-0.033979	-0.006694
199	E	-0.04003	0.011358	0.025957	-0.19089	-0.239165
200	F	-0.028819	0.133464	-0.10655	-0.209445	0.085831
201	V	-0.035062	0.059031	-0.000761	-0.066106	-0.04957
202	A	-0.005717	0.028062	0.003225	-0.051119	-0.26266
203	Y	0.023372	-0.008609	0.025612	0.092442	-0.113574
204	P	-0.007899	-0.016942	-0.006994	-0.027371	-0.054835
205	I	-0.022289	0.030469	0.041001	-0.104558	-0.222029
206	Q	-0.023403	0.004591	0.024852	-0.022272	-0.035531
207	L	-0.011513	-0.009738	0.031142	-0.118627	-0.07522
208	V	-0.017653	-0.005672	-0.001511	-0.02532	-0.030307
209	V	-0.019324	-0.006922	0.000266	-0.005709	-0.089875
210	T	-0.008998	-0.005177	0.012472	0.059351	0.039116
211	K	0.01761	0.014594	0.031993	-0.030107	-0.056526
212	E	0.009927	0.006994	0.019153	0.040355	-0.009327
213	V	0.00393	0.013566	-0.004583	-0.020317	-0.021308
214	E	-0.00482	0.000314	0.027471	-0.003381	0.00938
215	K	0.025259	0.018326	0.001362	0.044187	-0.013501
216	E	-0.000218	-0.005228	0.000919	0.031983	0.020058
217	V	0.009168	-0.010115	-0.005399	-0.000726	-0.01829
218	P	-0.00942	-0.012291	0.008584	0.008353	-0.010993
219	I	-0.01078	0.016547	-0.025254	-0.002303	0.015077
220	P	-0.019873	-0.03047	-0.02085	0.017982	-0.038551
221	E	0.070677	0.068154	0.048985	0.017898	-0.005836
222	E	#VALUE!	#VALUE!	#VALUE!	#VALUE!	#VALUE!
223	E	0.009271	-0.021699	-0.007663	0.001921	-0.004546
224	K	0.017228	0.003957	-0.011713	0.005115	0.036784
225	K	-0.002719	-0.008108	-0.018192	0.023692	-0.007706
226	D	0.018621	0.007983	0.021552	0.002641	-0.011436
227	E	-0.007781	-0.016423	-0.008336	0.000489	0.009576
228	E	0.002211	0.007087	0.001491	0.061894	0.019227
229	K	-0.001955	-0.002585	0.000897	0.019323	0.033159
230	K	-0.043167	-0.062744	-0.039301	-0.060566	-0.091172
231	D	0.010479	0.001573	-0.001047	0.063342	0.020177
232	E	-0.025976	0.005615	0.003575	0.012191	0.03659
233	E	0.003793	-0.001456	-0.002527	-0.023632	0.020491
234	K	-0.015608	-0.011941	-0.024757	-0.027535	0.000259
235	K	0.000729	0.00211	-0.001998	0.019105	0.025538
236	D	0.013573	-0.00196	0.004045	-0.009195	-0.013573
237	E	0.013006	0.021616	-0.005886	0.034385	0.051581
238	D	-0.021842	-0.007336	-0.019101	-0.009457	-0.036792
239	D	0.001449	-0.026367	0.005359	-0.040575	0.007039
240	K	0.003639	-0.014612	-0.008554	-0.024815	-0.050041
241	K	-0.019654	-0.035794	-0.038308	0.04083	0.030114
242	P	0.018609	0.011294	0.008269	-0.006914	-0.103226
243	K	-0.006811	0.001039	-0.020752	-0.02996	-0.048364
244	L	-0.005104	0.000457	-0.027412	-0.036257	-0.054642
245	E	0.010938	-0.008149	0.017012	-0.011915	-0.048039
246	E	0.021885	0.009126	0.008473	0.046366	0.023312
247	V	0.010584	0.016733	-0.001893	-0.039738	-0.110328
248	D	0.017564	0.020511	0.01348	0.038494	-0.005465
249	E	-0.005747	0.012927	-0.014498	-0.041629	-0.060522
250	E	-0.003716	-0.00081	-0.014413	-4.5e-05	-0.0083
251	E	0.002256	-0.00399	-0.029937	0.047046	-0.011399
252	E	-0.017325	-0.008771	-0.036364	-0.014793	-0.025089
253	K	-0.005323	-0.030729	-0.023313	0.008177	-0.010822
254	K	0.01768	0.053347	0.008207	0.036802	0.048382
255	P	-0.002324	-0.0166	-0.018793	-0.025263	-0.013669
256	K	-0.003025	-0.027576	0.015338	-0.038373	-0.040428
257	T	-0.042195	-0.044444	-0.047767	-0.01248	-0.020096
258	K	-0.009893	-0.015988	-0.015933	0.019513	0.059282
259	K	-0.015411	-0.025391	-0.042436	-0.050548	-0.012986
260	V	-0.028288	-0.026446	-0.044375	-0.034357	-0.065733
261	K	0.017457	-0.001743	0.015385	-0.005179	-0.078053
262	E	-0.020182	-0.025811	-0.033622	-0.038222	-0.005901
263	E	0.011709	-0.005504	0.052993	0.065342	0.049232
264	V	-0.003052	0.009349	-0.004014	-0.011765	-0.079545
265	Q	-0.016992	-0.005077	0.006064	-0.002881	-0.055729
266	E	-0.037536	-0.012018	-0.012918	-0.056798	-0.031648
267	I	0.02669	0.043012	0.021715	0.002176	-0.010466
268	E	-0.019406	0.008226	-0.042504	-0.103817	-0.055398
269	E	0.011051	0.033317	0.030024	-0.011599	-0.040086
270	L	-0.053153	0.055616	0.08684	-0.108644	-0.230067
271	N	0.032644	-0.006825	-0.010861	-0.006909	-0.203649
272	K	0.000904	0.001597	0.044778	0.001073	-0.024816
273	T	-0.000497	0.02847	0.009849	0.012915	-0.048657
274	K	-0.011171	-0.019934	0.015922	-0.099549	-0.14729
275	P	-0.025783	0.103767	0.162702	-0.148787	-0.291038
276	L	-0.024888	-0.02396	-0.031271	-0.119568	-0.187902
277	W	0.005669	0.063401	0.172621	0.042883	-0.159344
278	T	0.01549	0.024443	0.008671	-0.022494	0.000213
279	R	-0.004875	-0.019772	-0.009996	-0.039502	-0.138546
280	N	-0.032387	-0.00122	-0.03646	-0.010135	0.022188
281	P	0.006918	-0.009419	0.040208	0.098966	0.292951
282	S	-0.01438	-0.018169	-0.008253	0.014478	-0.05228
283	D	0.016653	0.000609	-0.008713	-0.020199	-0.040512
284	I	-0.020374	0.008553	0.032989	-0.04922	-0.073656
285	T	-0.034549	-0.065582	-0.008809	-0.002994	-0.007834
286	Q	0.011849	-0.01208	0.016604	0.007655	0.042333
287	E	-0.004318	0.005921	-0.037204	0.02526	0.044664
288	E	0.001257	-0.004687	-0.000793	-0.043178	-0.067042
289	Y	0.014815	0.016261	0.074048	0.090502	0.13351
290	N	-0.011171	0.005877	0.035361	0.067702	0.126364
291	A	-0.005494	0.017987	0.038227	-0.013676	-0.046103
292	F	-0.025504	0.016052	0.032555	0.02794	0.096429
293	Y	-0.026831	0.17209	0.034603	-0.007335	0.305034
294	K	-0.011698	-0.014713	-0.001082	-0.003597	0.012923
295	S	-0.015891	-0.010615	0.035141	-0.017586	-0.108707
296	I	0.002218	0.040171	0.000231	0.02996	0.024573
297	S	0.003318	0.021421	0.04816	-0.051573	0.217349
298	N	-0.033824	0.087507	-0.012151	-0.15588	0.231123
299	D	-0.042741	0.277404	-0.009149	-0.066393	0.311423
300	W	-0.021574	0.467421	0.129688	0.046231	0.298876
301	E	-0.00659	0.064045	0.024247	-0.00936	0.095919
302	D	-0.0001	0.000207	0.015764	0.067843	0.090787
303	P	0.035353	0.025194	0.08788	0.161116	0.319995
304	L	-0.02396	0.005689	0.027687	0.03719	0.107344
305	Y	0.002615	0.002382	0.070844	0.143349	0.2773
306	V	0.014551	0.020528	0.043374	0.07692	0.196208
307	K	0.00359	0.019562	0.04601	-0.015317	-0.096842
308	H	0.027663	0.029735	0.101055	0.098412	0.18169
309	F	-0.034432	0.018198	0.080047	0.004465	0.192929
310	S	0.034777	0.029628	0.154227	0.20219	0.413096
311	V	0.007452	0.064402	0.141397	0.112127	0.010623
312	E	0.002211	0.03584	0.033453	-0.230206	-0.471963
313	G	-0.035959	0.064428	0.356363	-0.027449	-0.219077
314	Q	0.039185	-0.005565	0.007066	0.009766	-0.290125
315	L	-0.036086	0.103305	0.290088	0.180461	0.158684
316	E	-0.005933	-0.001824	-0.041512	-0.160424	-0.150526
317	F	-0.042717	0.020059	0.107113	-0.057059	-0.071142
318	R	-0.004826	0.015352	0.007482	0.038227	-0.024557
319	A	-0.013982	0.03412	0.020135	-0.039851	-0.227035
320	I	0.020994	0.029675	0.013147	-0.003471	-0.143194
321	L	-0.01377	0.02927	0.03385	0.008113	0.02122
322	F	-0.011612	0.00749	-0.043048	-0.036167	-0.127202
323	I	0.002531	0.026616	-0.022007	0.045192	-0.01327
324	P	-0.024931	0.05002	0.018919	0.015023	0.092365
325	K	0.000906	0.0135	-0.007908	0.043131	0.06031
326	R	-0.003674	0.06765	0.039878	0.042643	0.26901
327	A	0.009171	-0.014789	-0.027325	0.042738	-0.081836
328	P	0.017935	0.020493	-0.009674	-0.038035	-0.23507
329	F	0.004209	0.062956	0.004636	0.113901	0.058746
330	D	0.006774	0.029014	0.033686	-0.071608	-0.27287
331	L	-0.009039	0.030331	-0.005367	-0.057136	0.097588
332	F	-0.079354	0.283511	-0.065335	-0.044563	0.120302
333	E	-0.017098	0.14149	0.076086	-0.068589	0.099018
334	S	0.019675	0.04208	0.00487	-0.089817	-0.115007
335	K	0.007037	0.013755	0.006257	0.015193	0.167929
336	K	-0.043985	0.010795	0.003803	0.033527	0.194026
337	K	0.031703	0.010488	0.024544	0.03967	0.149613
338	K	-0.021812	0.005649	0.005097	-0.030237	0.029968
339	N	-0.006049	0.002825	0.023399	0.002497	0.027751
340	N	-0.026175	-0.016291	-0.005241	-0.020141	-0.004188
341	I	-0.022815	0.06086	-0.061483	-0.199378	-0.209857
342	K	0.021492	0.019021	0.011206	0.073209	-0.0094
343	L	0.025246	0.106809	0.03422	-0.069236	-0.128133
344	Y	-0.032105	0.097926	-0.027859	-0.284949	-0.232133
345	V	0.01	0.017902	0.110427	0.018715	-0.321992
346	R	-0.023072	0.057863	0.030271	-0.107104	0.176803
347	R	-0.009742	0.021503	-0.001327	-0.139103	-0.270235
348	V	0.026486	0.153635	-0.098004	-0.076339	0.098269
349	F	-0.111633	0.071555	-0.058322	-0.395789	-0.257937
350	I	-0.013642	0.057934	-0.043349	-0.009041	-0.096633
351	T	-0.000995	0.0219	0.034134	-0.209805	-0.308272
352	D	-0.024433	0.142189	0.115915	-0.093925	0.163333
353	E	-0.007481	0.029497	0.022219	-0.050918	-0.168775
354	A	0.006671	0.024101	0.011264	-0.001706	-0.016468
355	E	-0.022345	0.012784	-0.042454	-0.020478	-0.157484
356	D	-0.022284	0.030474	-0.015847	0.002421	-0.033629
357	L	0.002788	-0.006953	0.012574	-0.040782	-0.147991
358	I	0.001168	0.010747	0.003444	-0.035823	-0.042448
359	P	-0.007778	-0.025659	-0.025919	-0.044812	-0.219327
360	E	-0.021753	0.068841	0.040015	-0.039527	-0.025128
361	W	-0.029082	0.000626	0.016897	-0.017062	-0.110049
362	L	0.021223	0.044205	0.027443	-0.030439	-0.041178
363	S	-0.003309	-0.013219	-0.002779	0.046916	-0.021903
364	F	-0.005487	0.038378	0.044191	-0.078855	-0.135884
365	V	-0.025986	0.01915	-0.047563	-0.034745	-0.09883
366	K	-0.008203	-0.046023	-0.040363	-0.035029	-0.089663
367	G	0.002729	0.060365	-0.002894	-0.070598	-0.178458
368	V	0.012701	0.017253	0.188335	0.256441	-0.038759
369	V	-0.003298	0.022969	-0.00307	0.013866	-0.080545
370	D	0.023025	0.084476	0.187238	0.13366	-0.068021
371	S	0.036499	0.02356	0.076336	0.127809	-0.070347
372	E	-0.0169	0.014195	-0.00293	-0.092713	0.08301
373	D	-0.02374	0.041649	0.124326	-0.102505	-0.224344
374	L	0.056591	0.135287	0.098168	-0.051471	-0.208331
375	P	0.011956	0.211933	0.368929	0.442834	0.020377
376	L	-0.037152	0.082423	-0.152695	-0.071756	-0.195813
377	N	-0.001104	0.034589	0.050842	-0.007896	-0.174744
378	L	0.014187	0.090712	-0.052554	-0.030473	-0.113577
379	S	0.037513	0.063812	0.023821	0.031942	-0.130086
380	R	0.015507	0.018804	-0.008234	-0.013852	-0.023894
381	E	0.105127	0.116144	0.170884	0.015794	-0.404789
382	M	0.009257	-0.006652	0.03057	0.050186	-0.076589
383	L	0.068663	0.159369	0.214479	0.151483	-0.178721
384	Q	0.055553	0.087613	0.222824	0.208539	-0.347052
385	Q	0.022468	0.01009	0.058864	0.047579	-0.145695
386	N	0.041917	0.044936	0.126199	0.129347	-0.174987
387	K	0.002656	0.002153	0.110583	0.165126	0.267977
388	I	-0.037854	0.066572	0.244734	0.271394	0.112481
389	M	0.033302	0.023725	0.106385	0.128147	-0.077719
390	K	0.002091	-0.009983	0.154234	0.261488	0.406909
391	V	0.01938	0.059463	0.202767	0.323604	0.261188
392	I	0.001663	-0.00737	0.062878	0.075941	0.062223
393	R	-0.041223	-0.018003	0.040499	0.014448	0.181455
394	K	-0.004788	0.018034	0.116096	0.214055	0.025421
395	N	0.011917	0.04088	-0.036962	-0.056927	-0.186093
396	I	0.02572	0.028064	0.036723	0.006207	0.004162
397	V	-0.025661	-0.005058	0.017952	-0.081581	-0.095762
398	K	0.027856	-0.005834	0.077662	0.034378	-0.566965
399	K	0.008565	-0.001052	0.089521	0.00192	-0.32248
400	L	0.006845	0.011049	0.003114	-0.033125	-0.117968
401	I	0.019312	0.013249	0.013147	-0.05288	-0.236051
402	E	-0.013086	-0.002966	-0.067757	-0.09211	-0.184125
403	A	-0.030973	0.003538	0.061966	0.053244	0.108011
404	F	-0.00141	0.067291	0.017325	-0.019114	-0.090839
405	N	-0.009309	0.003459	-0.0231	0.015639	-0.043022
406	E	-0.021501	0.02174	-0.005171	-0.037505	-0.035382
407	I	0.041796	0.034851	0.099527	0.128418	0.275476
408	A	-0.007101	0.008115	0.010013	0.035885	-0.005306
409	E	0.022559	0.063475	0.04081	0.045155	-0.127848
410	D	0.023288	0.046583	0.081374	0.057344	0.111704
411	S	0.034365	0.011986	0.062888	0.022234	-0.001949
412	E	0.053599	0.038706	0.072448	0.10865	0.105097
413	Q	-0.030834	-0.023675	-0.00125	0.035172	-0.001774
414	F	0.034678	0.04659	-0.003154	0.063197	0.052062
415	E	0.018266	0.026028	0.05161	0.009193	-0.014066
416	K	-0.006039	-0.018604	0.017426	-0.0235	0.000735
417	F	-0.010123	0.079311	0.11305	-0.02609	-0.109507
418	Y	-0.052735	0.001412	-0.019844	-0.074413	-0.05067
419	S	0.03545	0.013718	0.022312	0.001952	-0.043972
420	A	-0.026114	-0.012936	0.036826	-0.013052	0.089291
421	F	0.024322	0.028014	-0.002175	-0.119714	-0.159219
422	S	0.015213	-0.025426	0.009895	0.009927	-0.029706
423	K	0.043177	0.004203	0.033058	0.069923	-0.089799
424	N	-0.002964	0.065516	0.03508	-0.006043	0.053659
425	I	-0.005611	0.008628	-0.067164	-0.102049	-0.313841
426	K	-0.019021	0.027293	0.037046	-0.158374	-0.116183
427	L	0.033324	0.045029	0.01497	0.06083	-0.089004
428	G	-0.032901	0.130661	0.083615	-0.215315	-0.172723
429	V	-0.034036	0.142718	0.093942	-0.10369	0.047973
430	H	-0.023782	0.048743	-0.012057	0.031445	0.068916
431	E	0.007337	0.057997	0.00846	-0.06941	-0.199889
432	D	0.004847	0.011946	-0.028463	-0.046287	-0.111765
433	T	0.007608	0.032191	0.026087	0.02285	0.050167
434	Q	-0.00246	0.010828	0.002162	0.054921	-0.032181
435	N	0.01112	0.020578	0.017452	0.013889	0.002854
436	R	-0.014481	0.013254	0.026733	-0.056552	-0.002609
437	A	-0.00478	0.011043	-0.004323	-0.015084	-0.067597
438	A	0.014991	0.029688	0.003265	-0.032615	-0.016097
439	L	-0.015855	0.006319	-0.001104	-0.08989	-0.139377
440	A	-0.031476	0.060146	0.059059	-0.22893	0.066916
441	K	-0.013005	-0.004978	-0.014343	-0.041803	-0.052478
442	L	0.022437	0.006388	0.008716	0.065982	0.022523
443	L	-0.057246	0.067923	-0.003248	-0.062478	-0.029949
444	R	-0.012994	0.00821	0.053256	0.028637	-0.036535
445	Y	0.025362	-0.007466	-0.013228	0.003262	-0.019449
446	N	0.004777	0.027344	0.011439	0.027205	-0.004773
447	S	-0.009373	0.030724	0.002369	0.004726	-0.096451
448	T	-0.004298	0.008198	0.016605	-0.011021	-0.011002
449	K	0.011395	0.0163	0.008897	-0.011434	0.013064
450	S	-0.031907	-0.018952	-0.012846	-0.03922	0.003766
451	V	-0.004759	0.019471	0.010903	-0.039976	-0.002233
452	D	0.000111	0.008984	-0.009586	-0.112263	-0.01573
453	E	-0.031874	-0.013133	-0.01475	-0.030774	-0.009702
454	L	0.03061	0.030611	0.064853	0.01723	0.016875
455	T	-0.012473	0.000327	0.000338	0.020246	-0.025015
456	S	-0.025122	-0.032122	-0.008225	0.049798	0.103295
457	L	-0.020902	-0.002961	0.028391	-0.054206	-0.033363
458	T	-0.002035	0.014597	-0.003546	0.014887	-0.002604
459	D	0.012963	0.032446	0.094869	0.072447	0.072482
460	Y	0.007684	0.006341	0.010473	-0.115637	-0.097629
461	V	-0.009023	0.021377	0.012969	0.05135	0.008332
462	T	0.005025	0.012851	0.043442	0.003594	0.006078
463	R	0.028406	0.000224	0.006932	-0.022023	-0.086331
464	M	0.02222	-0.005606	0.020398	0.013518	-0.022275
465	P	0.015753	-0.003781	0.013607	0.016861	0.005475
466	E	-0.018366	-0.008892	-0.013595	0.002964	-0.035357
467	H	0.025332	0.002572	0.015999	0.049132	0.000705
468	Q	0.022888	-0.003113	0.036889	-0.010032	-0.031617
469	K	-0.019593	-0.011095	-0.002115	-0.029742	-0.030193
470	N	0.042231	0.032705	0.03786	0.063331	-0.055992
471	I	-0.015417	-0.008057	0.015948	-0.039484	-0.095741
472	Y	-0.050098	-0.011644	-0.036262	-0.155815	-0.477524
473	Y	-0.048075	-0.026286	-0.004965	-0.099004	-0.08258
474	I	-0.025756	0.004053	-0.02323	-0.156101	-0.274585
475	T	-0.047388	0.006329	0.028167	-0.186522	-0.193603
476	G	-0.095986	0.060027	-0.064423	-0.396466	-0.545038
477	E	0.000714	0.028149	0.003798	-0.014366	-0.031556
478	S	0.002591	0.027519	-0.001377	-0.05197	-0.144488
479	L	0.022746	-2e-05	0.003707	0.033286	-0.037574
480	K	-0.032053	-0.022673	-0.004996	-0.083016	-0.08377
481	A	-0.012143	-0.001718	0.002355	-0.003924	-0.043149
482	V	-0.048267	0.023925	-0.041098	-0.225688	-0.37468
483	E	0.015226	0.025186	0.015357	-0.05183	-0.011679
484	K	-0.006524	-0.027136	-0.0434	-0.06039	-0.061883
485	S	-0.024766	0.018913	-0.02366	-0.222632	-0.493233
486	P	0.003564	0.031924	-0.004642	0.012276	-0.185519
487	F	-0.02731	0.048095	0.072901	-0.310175	-0.452056
488	L	-0.032212	0.026191	-0.022735	-0.1061	-0.33434
489	D	0.00646	-0.026031	-0.040407	-0.032146	-0.014779
490	A	0.011647	-0.020693	0.027669	-0.095599	-0.196831
491	L	-0.00196	0.013506	0.036777	-0.135556	-0.380925
492	K	-0.0225	-0.037662	-0.046849	-0.03406	-0.147674
493	A	0.00203	0.018032	0.001643	0.042743	-0.077958
494	K	0.003231	-0.00188	0.000467	-0.005703	-0.028156
495	N	0.007789	0.007514	0.004246	-0.010223	-0.06717
496	F	0.008559	0.05117	0.023211	-0.036192	-0.04591
497	E	-0.002243	0.011908	0.041758	-0.013639	-0.060969
498	V	-0.025435	0.035774	-0.005528	-0.034649	-0.162372
499	L	-0.003513	0.046362	-0.006545	0.019554	-0.067536
500	F	-0.034892	-0.002948	-0.029015	-0.119156	-0.216222
501	L	-0.029609	0.010405	-0.013951	-0.253624	-0.200831
502	T	-0.009344	-0.015363	-0.013667	-0.063889	-0.062539
503	D	0.012179	0.05347	0.026613	0.01458	-0.130292
504	P	-0.008474	0.096722	0.015724	-0.079355	-0.04139
505	I	0.005221	0.153201	0.105852	0.405073	0.003251
506	D	-0.048033	0.272579	0.135346	0.14038	-0.065746
507	E	-0.004485	0.017387	-0.022528	-0.126639	-0.500719
508	Y	-0.032729	0.073986	0.029947	-0.015119	-0.033491
509	A	-0.055577	0.144137	0.092871	0.064436	0.022045
510	F	0.002228	0.021227	0.011825	-0.091014	-0.048408
511	T	-0.002371	0.001234	-0.008437	0.023566	-0.028215
512	Q	0.008811	0.031553	-0.001477	-0.05481	0.028526
513	L	-0.026386	0.030591	0.020555	-0.175766	-0.0324
514	K	0.021075	-0.018872	0.006433	-0.011786	0.030541
515	E	-0.018621	0.001343	0.005304	-0.023068	-0.136231
516	F	0.008507	-0.012374	-0.022574	-0.059473	-0.069975
517	E	-0.012205	0.01639	0.016738	0.036428	-0.055088
518	G	-0.011555	-0.003728	-0.035255	-0.095617	-0.074361
519	K	-0.035767	-0.004956	-0.012518	-0.033823	-0.047162
520	T	-0.008685	-0.004748	0.008108	-0.008495	0.014811
521	L	-0.023486	0.026339	-0.02434	-0.081035	-0.11268
522	V	0.009501	0.024519	0.001735	-0.023282	-0.05283
523	D	-0.018994	0.04321	0.028615	-0.179669	-0.406082
524	I	-0.012005	0.059234	0.003972	-0.055217	-0.196874
525	T	-0.011809	0.036861	-0.017321	-0.263716	-0.32027
526	K	0.002762	0.078035	0.011995	-0.168403	-0.08471
527	D	-0.004707	0.008852	-0.018679	-0.001034	-0.257459
528	F	-0.000805	0.033046	0.04822	-0.275555	-0.55789
529	E	-0.012703	-0.012777	0.02132	-0.008064	-0.046066
530	L	0.006784	-0.003944	-0.005538	-0.078334	-0.301829
531	E	0.018184	0.006732	-0.0027	-0.042717	-0.10419
532	E	0.023041	0.032136	0.005664	0.013278	-0.049435
533	T	-0.015195	-0.007647	0.003645	0.013318	-0.00174
534	D	-0.023056	-0.007917	-0.010654	-0.02917	-0.024355
535	E	-0.022714	-0.020394	-0.025258	-0.028403	-0.017139
536	E	0.009497	-0.02251	-0.007678	-0.048442	-0.019381
537	K	-0.049164	0.004983	-0.028889	-0.068898	-0.185337
538	A	-0.001587	-0.010792	-0.015761	-0.027397	0.008607
539	E	-0.012144	-0.004385	0.001044	0.008409	-0.036834
540	R	0.007206	0.00654	0.005663	0.002004	-0.034606
541	E	0.002257	0.01298	0.02943	-0.02309	-0.008775
542	K	0.013634	0.011874	0.028415	0.040993	-0.017266
543	E	0.033024	0.008189	0.048831	0.091955	0.060901
544	I	-0.012714	-0.025749	-0.033594	-0.00346	-0.013848
545	K	-0.048008	-0.038246	-0.015897	-0.025277	-0.017104
546	E	-0.003414	-0.017084	0.000942	0.017175	0.009911
547	Y	0.015111	0.015752	0.051451	0.008881	-0.038437
548	E	0.024596	0.023259	0.026872	0.004273	0.047857
549	P	0.00198	0.003523	0.002933	-0.014626	-0.012406
550	L	0.006249	-0.002966	0.024667	-0.067844	-0.125164
551	T	-0.011005	-0.026224	-0.032174	-0.005565	-0.025214
552	K	-0.011702	-0.007324	-0.000291	-0.054519	0.015055
553	A	0.003062	0.009633	0.00913	0.006314	0.034371
554	L	0.008745	0.037909	0.003965	-0.002236	-0.033495
555	K	0.009586	-0.018382	0.003689	0.005679	0.048147
556	E	-0.008157	0.00212	-0.008137	0.020263	0.016891
557	I	-0.009096	-0.012109	-0.030442	-0.042389	0.011455
558	L	-0.001199	0.028567	0.041063	-0.099272	-0.163978
559	G	0.013079	-0.000417	-0.006282	0.037394	-0.01335
560	D	-0.009643	-0.010269	-0.004776	-0.039525	-0.037068
561	Q	0.018731	0.005826	0.030191	-0.019029	0.015488
562	V	-0.037225	-0.022964	-0.03463	-0.081067	-0.172674
563	E	0.011668	-0.017635	-0.014996	0.004892	-0.173691
564	K	0.010681	0.009948	0.000501	0.035543	-0.085463
565	V	-0.0253	0.080555	0.018269	-0.105515	-0.207007
566	V	-0.018248	-0.011493	-0.004982	0.00497	-0.043213
567	V	-0.010709	0.016492	-0.023269	-0.021421	-0.09279
568	S	-0.019858	0.007597	-0.008403	-0.058282	-0.104261
569	Y	0.054096	0.059405	0.010024	0.071111	-0.01489
570	K	-0.00093	0.009021	0.011399	-0.079068	-0.104358
571	L	0.008563	0.018277	0.032585	0.052748	-0.00779
572	L	0.013579	0.028959	0.01182	-0.013636	-0.00041
573	D	-0.026883	-0.033521	-0.013758	0.027277	-0.027506
574	A	0.014641	0.004638	0.033747	-0.027267	-0.043731
575	P	0.005865	0.019745	0.020686	-0.024483	-0.094951
576	A	-0.035686	0.027796	-0.000329	-0.129497	-0.243544
577	A	-0.025596	-0.015157	0.031735	-0.131707	-0.313603
578	I	-0.013109	0.035874	0.062474	-0.118633	-0.312083
579	R	0.007323	0.070278	0.149094	-0.183587	-0.487125
580	T	-0.017606	0.054941	0.021062	-0.144693	-0.296222
581	G	0.005331	-0.001049	0.026041	-0.091504	-0.301995
582	Q	0.014843	0.019448	0.006933	0.037383	-0.073806
583	F	0.002078	0.092246	0.143207	-0.088844	-0.431395
584	G	-0.034594	0.105675	0.153938	-0.308413	-0.217086
585	W	0.003417	0.156158	0.233876	0.075511	-0.446485
586	S	0.026536	0.087451	0.067905	-0.117223	-0.093238
587	A	-0.083141	0.10306	0.05415	-0.363012	-0.517883
588	N	-0.035309	0.036587	0.012919	-0.166372	-0.373151
589	M	-0.008314	0.065075	0.005082	-0.187751	-0.302176
590	E	-0.034573	0.019958	0.010903	-0.202925	0.024571
591	R	-0.050253	0.033875	0.027089	-0.426786	-0.547083
592	I	0.016191	0.123494	0.034171	-0.014792	-0.191877
593	M	0.016678	0.053401	0.04013	0.102835	-0.209177
594	K	0.006074	0.046506	0.016444	-0.086562	-0.350393
595	A	-0.007525	0.058424	0.034543	-0.138742	-0.102392
596	Q	0.014375	0.134271	0.085085	0.012872	0.076559
597	A	-0.015658	0.069452	0.045548	0.10374	-0.123698
598	L	0.046598	0.049825	0.012527	0.250488	-0.103403
599	R	0.006266	0.094479	0.040866	0.002098	0.393476
600	D	-0.012099	0.040686	0.053438	-0.006235	-0.137553
601	S	0.006726	0.004489	0.034523	-0.000853	0.037756
602	S	0.014328	0.047371	0.005667	-0.037826	0.061731
603	M	-0.005998	0.0416	0.048456	-0.129893	-0.156116
604	S	-0.014563	0.038173	0.028757	-0.029441	0.096303
605	S	0.027001	0.01741	0.019713	0.028206	0.057824
606	Y	-0.012544	0.187861	0.158245	-0.322868	-0.108178
607	M	0.022317	0.180681	0.1337	-0.221412	-0.139622
608	S	-0.041479	0.006912	0.004078	-0.017758	0.070385
609	S	-0.019885	0.047751	-0.003344	-0.09602	-0.115934
610	K	-0.003373	0.013184	0.029145	-0.121552	-0.095436
611	K	-0.045672	0.117887	0.271469	-0.321545	-0.406522
612	T	-0.012273	0.003867	0.016685	-0.077102	-0.030803
613	F	0.003108	0.074124	0.082339	-0.107946	-0.298478
614	E	-0.01525	0.023299	0.081864	-0.189513	-0.497109
615	I	-0.007772	0.136772	0.049941	-0.021033	-0.135628
616	S	0.019907	0.007632	0.045721	0.039901	0.002562
617	P	0.027649	0.008944	0.020325	0.055054	0.007
618	K	0.001222	0.000649	-0.016847	0.022403	-0.003554
619	S	-0.015019	-0.023639	-0.00203	-0.047007	-0.071273
620	P	-0.008946	0.002113	-0.013825	-0.059594	-0.059694
621	I	-0.030814	0.021763	0.023576	-0.061841	-0.204866
622	I	0.012975	0.06986	0.03386	-0.030289	-0.035952
623	K	0.005197	-0.011082	-0.009656	-0.023097	0.018201
624	E	0.011899	0.000839	0.002522	-0.017164	-0.0308
625	L	-0.022348	0.053392	0.03868	-0.034212	-0.173936
626	K	-0.011016	0.015756	0.018547	-0.001887	0.015269
627	K	-0.009078	-0.023272	-0.009014	8e-05	-0.005712
628	R	-0.030176	-0.008189	-0.006512	-0.046159	-0.045821
629	V	0.009232	0.003726	0.009528	0.03072	-0.040011
630	D	-0.00405	0.003542	0.001435	0.058245	0.014306
631	E	-0.01778	-0.006582	0.001091	0.048548	0.006587
632	G	-0.021511	0.003105	0.004497	-0.04071	0.041419
633	G	-0.008712	-0.034973	0.002763	-0.014084	0.018481
634	A	0.00905	0.000718	-0.022691	-0.007546	0.013254
635	Q	0.001778	-0.017123	-0.001157	-0.046527	0.024092
636	D	0.021425	0.018232	0.0081	0.044788	-0.019455
637	K	0.017624	0.002038	-0.02199	-0.003266	0.014259
638	T	-0.00748	0.000313	0.007116	0.037022	-0.018955
639	V	-0.013755	-0.022646	-0.049897	0.059027	-0.008586
640	K	-0.012228	-0.014529	-0.002542	0.007979	0.032521
641	D	-0.022933	-0.030007	0.00417	-0.048791	-0.0924
642	L	0.017501	0.038316	0.010666	-0.045085	-0.096476
643	T	-0.014807	-0.004778	0.003164	-0.041958	-0.094286
644	K	-0.005806	0.000712	0.000602	0.009662	0.004659
645	L	-0.033559	0.03505	-0.001256	-0.082066	-0.206869
646	L	-0.013259	0.061239	0.015956	-0.056934	-0.126231
647	Y	0.02553	0.026168	0.038414	-0.059184	-0.022307
648	E	-0.011059	-0.008513	0.017479	-0.003264	-0.145838
649	T	-0.030539	0.015702	0.052995	-0.084287	-0.213685
650	A	-0.039758	0.034984	0.029294	-0.272243	-0.476208
651	L	-0.006517	0.016516	0.010519	-0.004981	-0.143371
652	L	-0.035662	0.077362	0.061605	-0.073674	-0.263632
653	T	-0.037309	-0.014929	-0.021013	-0.065041	-0.130441
654	S	-0.001629	0.067627	0.03604	-0.151731	-0.325518
655	G	-0.051973	0.017488	0.002943	-0.112735	-0.432083
656	F	-0.017189	0.027802	0.045775	-0.235007	-0.503543
657	S	-0.022098	-0.010193	-0.022243	-0.030247	-0.059456
658	L	0.014388	0.018623	0.017736	-0.058428	-0.266772
659	D	-0.006468	0.025801	0.005909	-0.00775	-0.008855
660	E	-0.004382	-0.003718	0.005676	-0.030948	-0.062808
661	P	-0.003185	0.008879	-5.9e-05	-0.038597	-0.16429
662	T	-0.022891	-0.006072	-0.030258	-0.024617	-0.015235
663	S	-0.025399	-0.024304	-0.014357	-0.015935	-0.039715
664	F	-0.009117	0.098379	0.068397	-0.068657	-0.145543
665	A	-0.009192	-0.017135	-0.024854	-0.101315	-0.18709
666	S	-0.00289	-0.010324	-0.024317	0.031202	0.033212
667	R	-0.006076	0.009532	0.038123	-0.01709	-0.022024
668	I	-0.038883	0.069096	0.065753	-0.036808	-0.219618
669	N	-0.01504	0.003022	-0.006405	-0.0265	-0.041006
670	R	-0.016417	0.003074	0.004727	-0.012912	-0.065528
671	L	0.018293	0.086841	0.084168	-0.008029	-0.28228
672	I	-0.018204	0.099589	0.048131	-0.070238	-0.246313
673	S	-0.0005	-0.005954	-0.012803	-0.015638	-0.009478
674	L	0.009944	0.01313	0.024673	0.060642	-0.11948
675	G	0.064096	0.107138	0.138869	0.143849	-0.157462
676	L	0.056759	0.120626	0.159119	0.127646	-0.188969
677	N	0.012164	0.033891	0.045225	-0.013302	-0.03671
678	I	-0.007253	0.002028	0.032831	-0.022063	-0.140203
679	D	0.017748	0.003906	0.020314	0.04633	-0.012361
680	E	-0.010034	0.01818	0.010273	0.000719	-0.025082
681	D	0.003016	0.023188	0.014037	0.002434	-0.022589
682	E	0.004053	0.030793	0.026206	-0.0433	-0.078872
683	E	-0.003698	0.0162	0.012096	-0.006327	-0.075694
684	T	0.004528	0.011938	-0.005582	-0.012389	0.011976
685	E	0.016043	0.027709	0.013002	0.031052	-0.018565
686	T	-0.015651	0.021387	0.019268	0.029317	0.002045
687	A	0.011954	-0.000342	0.000372	-0.024218	-0.039685
688	P	0.008216	0.019897	0.008929	0.027336	-0.041807
689	E	-0.005988	0.01561	0.000696	0.041175	-0.066502
690	A	0.007596	0.010905	0.03794	0.044408	-0.000957
691	S	-0.009076	0.008921	0.014106	0.022513	-0.061214
692	T	0.003512	0.020159	0.006096	-0.06329	-0.064257
693	A	-0.005145	0.003969	-0.00967	-0.021452	-0.055952
694	A	0.030468	0.039762	0.030902	0.007014	-0.03786
695	P	0.040362	0.010508	0.027349	0.025487	-0.018087
696	V	-0.009981	-0.009447	0.022729	-0.018973	-0.057809
697	E	0.001247	0.028179	0.026475	-0.04979	-0.051098
698	E	-0.020185	-0.014399	0.007238	0.007129	-0.061976
699	V	-0.005908	0.033024	0.018631	-0.011653	-0.056176
700	P	0.009383	0.015567	0.021099	0.045367	-0.01285
701	A	0.009129	0.010954	0.020599	-0.008182	-0.036533
702	D	-0.006334	-0.004806	-0.024948	-0.06007	-0.040552
703	T	0.007801	0.002133	0.018909	-0.007423	0.003056
704	E	0.006784	0.032633	0.01705	0.057101	-0.015284
705	M	0.025943	0.022117	0.002845	0.054491	-0.136476
706	E	0.022945	0.026839	0.01345	0.01572	-0.230027
707	E	-0.002529	0.005393	0.010063	0.012614	-0.067592
708	V	0.008734	0.052362	0.044511	0.010872	-0.387408
709	D	-0.016709	-0.054381	-0.004198	-0.031266	-0.072868
