# Supplementary material for: Comprehensive fitness maps of Hsp90 show widespread environmental dependence
Source: eLife journal article supplement (doi:10.7554/elife.53810), 2020-03-04
Supplement: supp [file elife-53810-supp-v1.zip › elife_poa_e53810_Supplementary_file_1.xlsx]

## Sheet: Sheet1
Oligo Name	Oligo Sequence
Oligos for barcode labeling and paired-end sequencing
N18 barcode cassette oligo 1	phosphate-GGCCGCGAGTCCTGCCNNNNNNNNNNNNNNNNNNAGATCGGAAGAGCGTCGTGG
N18 barcode cassette oligo 2	phosphate-CGCGCCACGACGCTCTTCCGATCTNNNNNNNNNNNNNNNNNNGGCAGGACTCGC
Hsp90 mutant/barcode assembly primer 1	CAAGCAGAAGACGGCATACGAGATCGGTCTCGGCATTCCTGCTGAACCGCTCTTCCGATCTTGGCCGCTCTAGAACTAGTAT
Hsp90 mutant/barcode assembly primer 2	CAAGCAGAAGACGGCATACGAGATCGGTCTCGGCATTCCTGCTGAACCGCTCTTCCGATCTGCAATTGGAAACAGAACCAGA
Hsp90 mutant/barcode assembly primer 3	CAAGCAGAAGACGGCATACGAGATCGGTCTCGGCATTCCTGCTGAACCGCTCTTCCGATCTATCCATGATTGGTCAATTCGG
Hsp90 mutant/barcode assembly primer 4	CAAGCAGAAGACGGCATACGAGATCGGTCTCGGCATTCCTGCTGAACCGCTCTTCCGATCTGGTTATTCTTGAAAGATGACCA
Hsp90 mutant/barcode assembly primer 5	CAAGCAGAAGACGGCATACGAGATCGGTCTCGGCATTCCTGCTGAACCGCTCTTCCGATCTAGAAGGATGAAGACGACAAGAA
Hsp90 mutant/barcode assembly primer 6	CAAGCAGAAGACGGCATACGAGATCGGTCTCGGCATTCCTGCTGAACCGCTCTTCCGATCTCTGATATCACTCAAGAAGAATA
Hsp90 mutant/barcode assembly primer 7	CAAGCAGAAGACGGCATACGAGATCGGTCTCGGCATTCCTGCTGAACCGCTCTTCCGATCTGTACGTTCGTCGTGTTTTCAT
Hsp90 mutant/barcode assembly primer 8	CAAGCAGAAGACGGCATACGAGATCGGTCTCGGCATTCCTGCTGAACCGCTCTTCCGATCTCTTCAACGAAATTGCTGAAGA
Hsp90 mutant/barcode assembly primer 9	CAAGCAGAAGACGGCATACGAGATCGGTCTCGGCATTCCTGCTGAACCGCTCTTCCGATCTAGCCTTCAACGAAATTGCTGA
Hsp90 mutant/barcode assembly primer 10	CAAGCAGAAGACGGCATACGAGATCGGTCTCGGCATTCCTGCTGAACCGCTCTTCCGATCTCCAGAATGCCAGAACACCAAAA
Hsp90 mutant/barcode assembly primer 11	CAAGCAGAAGACGGCATACGAGATCGGTCTCGGCATTCCTGCTGAACCGCTCTTCCGATCTTGACATTACTAAAGATTTCGA
Hsp90 mutant/barcode assembly primer 12	CAAGCAGAAGACGGCATACGAGATCGGTCTCGGCATTCCTGCTGAACCGCTCTTCCGATCTTTTGGTTGGTCTGCTAACAT
Hsp90 mutant/barcode assembly primer 13	CAAGCAGAAGACGGCATACGAGATCGGTCTCGGCATTCCTGCTGAACCGCTCTTCCGATCTTGACTAAGTTATTATATGAAAT
standard Illumina read 1 end primer	AATGATACGGCGACCACCGAGATCTACACTCTTTCCCTACACGACGCTCTTCCGATCT
Oligos for single-end sequencing of barcodes
identifier 1 primer	CAAGCAGAAGACGGCATACGAGATATTACTCGCCGCACCGATCGCCCTTCC
identifier 2 primer	CAAGCAGAAGACGGCATACGAGATTCCGGAGACCGCACCGATCGCCCTTCC
identifier 3 primer	CAAGCAGAAGACGGCATACGAGATCGCTCATTCCGCACCGATCGCCCTTCC
identifier 4 primer	CAAGCAGAAGACGGCATACGAGATGAGATTCCCCGCACCGATCGCCCTTCC
identifier 5 primer	CAAGCAGAAGACGGCATACGAGATATTCAGAACCGCACCGATCGCCCTTCC
identifier 6 primer	CAAGCAGAAGACGGCATACGAGATGAATTCGTCCGCACCGATCGCCCTTCC
identifier 7 primer	CAAGCAGAAGACGGCATACGAGATCTGAAGCTCCGCACCGATCGCCCTTCC
identifier 8 primer	CAAGCAGAAGACGGCATACGAGATTAATGCGCCCGCACCGATCGCCCTTCC
identifier 9 primer	CAAGCAGAAGACGGCATACGAGATCGGCTATGCCGCACCGATCGCCCTTCC
identifier 10 primer	CAAGCAGAAGACGGCATACGAGATTCCGCGAACCGCACCGATCGCCCTTCC
identifier 11 primer	CAAGCAGAAGACGGCATACGAGATTCTCGCGCCCGCACCGATCGCCCTTCC
identifier 12 primer	CAAGCAGAAGACGGCATACGAGATAGCGATAGCCGCACCGATCGCCCTTCC
Oligos for generation of individual mutants
I64D_F	CAGAACCAGATCTCTTTGATAGAATCACTCCAAAGC
I64D_R	GCTTTGGAGTGATTCTATCAAAGAGATCTGGTTCTG
G170D_F	GAAAGAATTGGTAGGGATACCATCTTGAGGTTATTC
G170D_R	GAATAACCTCAAGATGGTATCCCTACCAATTCTTTC
L499R_F	GCTAAAAACTTCGAGGTTAGATTCTTGACCGACC
L499R_R	GGGTCGGTCAAGAATCTAACCTCGAAGTTTTTAGC
L50D_F	GATACAAATCTGACTCTGATCCAAAGCAATTG
L50D_R	CAATTGCTTTGGATCAGAGTCAGATTTGTATC
K102A_F	CAAGTCTGGTACCGCAGCCTTCATGGAAGC
K102A_R	GCTTCCATGAAGGCTGCGGTACCAGACTTG
D180L_F	GGTTATTCTTGAAAGATCTCCAATTGGAGTAC
D180L_R	GTACTCCAATTGGAGATCTTTCAAGAATAACC
K398L_F	GAAAGAACATTGTCCTAAAGTTGATTGAAGCC
K398L_R	GGCTTCAATCAACTTTAGGACAATGTTCTTTC
K594I_F	CATGGAAAGAATCATGATAGCTCAAGCCTTGAG
K594I_R	CTCAAGGCTTGAGCTATCATGATTCTTTCCATG
T85G_F	CTGGTATTGGTATGGGCAAGGCTGAATTGATTAATAAC
T85G_R	GTTATTAATCAATTCAGCCTTGCCCATACCAATACCAG
I90A_F	GACCAAGGCTGAATTGGCTAATAACTTGGGTAC
I90A_R	GTACCCAAGTTATTAGCCAATTCAGCCTTGGTC
E144V_F	CAAAGAGCAACGACGACGTACAATACATCTGG
E144V_R	CCAGATGTATTGTACGTCGTCGTTGCTCTTTG
R326T_F	TTCATTCCAAAGACAGCACCATTCGACTTG
R326T_R	CAAGTCGAATGGTGCTGTCTTTGGAATGAA
